# Supplementary material for: Engineering Aspergillus oryzae for the Heterologous Expression of a Bacterial Modular Polyketide Synthase
Source: MDPI journal article supplement (doi:10.3390/jof7121085), 2021-12-17
Supplement: s1 [file s1]

# **Engineering *Aspergillus oryzae* for the Heterologous Expression of a Bacterial Modular Polyketide Synthase**

Jin Feng,<sup>a</sup> Maurice Hauser,<sup>a</sup> Russell J. Cox<sup>a\*</sup> and Elizabeth Skellam<sup>a,b\*</sup>

<sup>a</sup> Institute for Organic Chemistry and Biomolekular Wirkstoff Zentrum, Leibniz University Hannover, Schneiderberg 38, Hannover, 30167, Germany.

<sup>b</sup> Department of Chemistry and BioDiscovery Institute, University of North Texas,

\* Elizabeth.skellam@unt.edu, Russell.cox@oci.uni-hannover.de;

## **Electronic Supplementary Information**

### **Contents**

1. RT-PCR Study of Expression of *pcsA*, *mcsA* and *coaT* in *A. oryzae* NSAR1
2. Codon Optimization for DEBS1-TE and PCC
3. Sequences of DEBS1-TE and PCC
4. DEBS1-TE Expression Cassette Construction
5. Gene Expression Identification of DEBS1-TE and PCC
6. Fungal and Bacterial PPTase Alignment
7. Synthesis of TKL
8. Quantification of TKL
9. Deletion of Propionyl-CoA Degradation Pathways
10. Plasmids and Primers
11. References

# 1. RT-PCR Study of Expression of *pcsA*, *mcsA* and *coaT* in *A. oryzae* NSAR1

A

PcsA\_ *A. oryzae* RIB40

MTHPQQAVHAASLQNEAFWSHHAQQLHWHHKPSRAIGRSTKTLASGASHESWSWFPDGEISTTYNCVDRHVLNGNGDNVAIWDASAVTGKKEKYTYRQLLDEVEVLAVGLREEGVKKGDDVVIYMPMIPAALIGALA  
VARLGAIHAAVFGGFAAKSLAQRIEAAAPRAILTASCIEGAKGPIAYRPLVEGAIEASSFKPEKVLWQRDQLRWNNPKLGGQRNWNRLVKSARMRGIRAEPPVRSTDGLYIYISGTTGLPKGVVREAGGHAVGLSLI  
KYLFDIHGPGDTMFCASDIGWVVGHSYILYAPLLVGATTVLFEKGPVGTDAFTWVRVVAEHKANVLTAPTALRAIRKEDPDNKHFEKVAGDNNLRHLRALFLAGERSEPSIVRAYQDLTKHAARGALVVDNWWSSSEG  
SPISGLALRSAGVRVPPRSDEYDVAPLAIIRPGSAGLPMPPGFDRVVDDEGNEVAQGTMGNIIVMATPLAPTATFLNDDERFYKGYLKRFGGRWLDTGADAGMIDQDGYIHVMSRSDDIINVAHRFSTGQGSIEQAILSH  
PAIGEASVVGIPDALKGHLPPAFITLKQSGGNSPARPSAELFNSVNRVREQIGAIASLGGMIQGGMIPKTRSGKTLRRVLRELVENGARFEKEVAVPPTVEDRGVVEVAREKVREYFESQSGSPKAKL

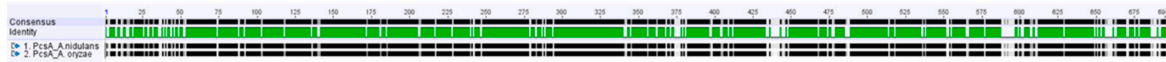

B

McsA\_ *A. oryzae* RIB40

MAMPMTTRTRHATKLAQSSRLAQYTSRRSYATAEPDLKSALKAVIPAKRELQVQVQKQDDVIGEVKANVIGGMRLKSMLEWGSVLDPEGIRFHGKTIKDCQKELPKGTSGTEMLPEAMFWLLTGQVPSTSQVRAF  
SRELAEKSHLPQHLDIKSFPRNMHPMTQLSIAVAALNTESQFAKAYEGLNKADYWEPTFDDISLAKIPRVAALVFRPEIDAVGTQALDVSQDWSYNFAELLKGGQQNQDFHDLRLYLALHGDHEGGNVAHATHL  
VGSALSDPFLSYAGLLAGPLHGLAAQEVLRWILSMQEKIGTKFTDEDVRYLWDTLKSGRVVPYGHGVLRKPDPRFEALMDFAATRDPVLANPVFQLVKNSEIAPGLTEHGKTKNPHPNVDAASGVLFYHYGFQQP  
LYYTVTFGVSRALGPLQLWDRALGLPIERPKSINLLGLKK

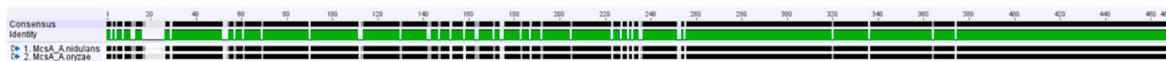

C

CoaT\_ *A. oryzae* RIB40

MSASALLRSRVRPSYLNKIKAEDLIDLPNGSYIGWVSGFTGVGYPKKVPTALADHVEKNLEGLKYTLFVGASSGAETENRWARLNMIDRRSPHQVGKEIAKGINNGQIKFFDKHLSMFPSDLTYGWYTLNPKPNRIDV  
AVIEASAITEDGGIIPGASVGSAPELVQMAQDKVIEVNTASPSFEGHLDITMSELPPNRKPYLLQPEDRIGTPHIPVDPEKVVAVESDYPDQTPNSPEDANSQAIASNLIEFLKHEVKHGRPLPNLLPIQSGIGNIANAVIGGLS  
KGGADFTNLKVVTEVLQDSFLDLFDSGNLDFATATSIKSPDGFGRFYDNWERYAGKLLRSQVQNSPEIIRLGCIGCMNTPVEVDYAHANSTCVMGSRMLNGLGGSADFLRSSKYSIMHTPSVRPSKTDPTGVSCIVPFA  
THIDQTEHDLVDIVTEQGLADVRGLSPREARVIRKCSHPDYTPILTDLDRAEFECLKKGMAHEPHLLFNAFKMHKNLQENGTMKISNWD

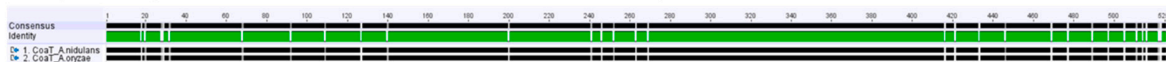

**Figure S1.1** Alignment of protein sequences of propionyl-CoA synthetase (PcsA), methylcitrate synthase (McsA), and CoA-transferase (CoaT): **A**, PcsA alignment of *A. nidulans* PcsA (accession number AY102074) and *A. oryzae* PcsA (accession number NC\_036441); **B**, McsA alignment of *A. nidulans* McsA (accession number AJ249117) and *A. oryzae* McsA (accession number XP\_001817006); **C**, CoaT alignment of *A. nidulans* CoaT (accession number XP\_659151) and *A. oryzae* CoaT (accession number XP\_001817633).

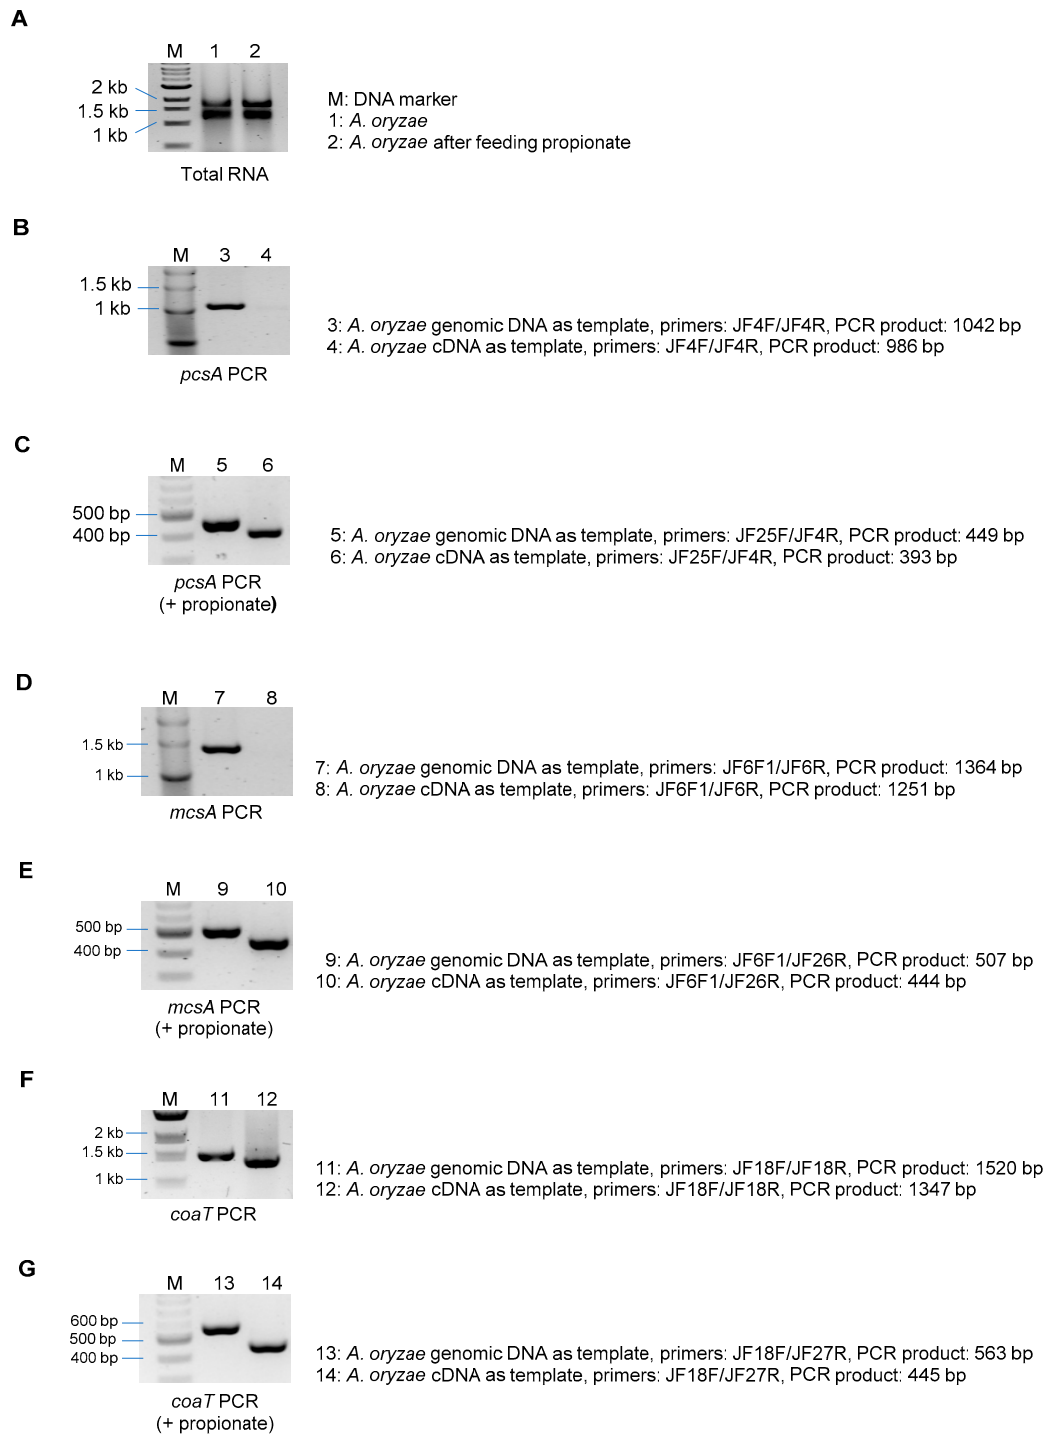

**Figure S1.2** RT-PCR identification of gene expression of *pcsA*, *mcsA* and *coaT* in *A. oryzae* NSAR1.

## 2. Codon Optimization for DEBS1-TE and PCC

**Table S1** Comparison of codon usage in *A. oryzae* genes with that in native and codon-optimized DEBS1-TE.

| Amino acid | Codon | Frequency (%) |          |           | Amino acid | Codon | Frequency (%) |          |           |
|------------|-------|---------------|----------|-----------|------------|-------|---------------|----------|-----------|
|            |       | A. oryzae     | DEBS1-TE |           |            |       | A. oryzae     | DEBS1-TE |           |
|            |       |               | Native   | Optimized |            |       |               | Native   | Optimized |
| Ala        | GCG   | 28            | 50       | 0         | Leu        | CTT   | 19            | 3        | 0         |
|            | GCA   | 23            | 3        | 0         |            | CTC   | 23            | 31       | 100       |
|            | GCT   | 27            | 2        | 0         |            | CTA   | 11            | 0        | 0         |
|            | GCC   | 31            | 45       | 100       |            | CTG   | 22            | 59       | 0         |
| Arg        | CGT   | 18            | 6        | 0         | Lys        | AAA   | 36            | 0        | 8         |
|            | CGC   | 23            | 48       | 100       |            | AAG   | 64            | 0        | 92        |
|            | CGA   | 17            | 4        | 0         | Met        | ATG   | 100           | 100      | 100       |
|            | CGG   | 18            | 36       | 0         |            | Phe   | TTT           | 38       | 1         |
|            | AGA   | 13            | 0        | 0         | TTC        | 62    | 99            | 100      |           |
|            | AGG   | 12            | 6        | 0         | Pro        | CCT   | 27            | 4        | 100       |
| Asn        | AAT   | 45            | 8        | 0         |            | CCC   | 26            | 35       | 0         |
|            | AAC   | 55            | 92       | 100       |            | CCA   | 25            | 2        | 0         |
| Asp        | GAT   | 53            | 5        | 100       | CCG        | 22    | 59            | 0        |           |
|            | GAC   | 47            | 95       | 0         |            | Ser   | AGT           | 13       | 2         |
| Cys        | TGT   | 46            | 10       | 0         | AGC        |       | 18            | 22       | 0         |
|            | TGC   | 54            | 90       | 100       | TCT        |       | 18            | 1        | 0         |
| Gln        | CAA   | 43            | 7        | 0         | TCC        |       | 20            | 27       | 100       |
|            | CAG   | 57            | 93       | 100       | Thr        |       | TCA           | 14       | 2         |
| Glu        | GAA   | 44            | 23       | 0         |            | TCG   | 16            | 46       | 0         |
|            | GAG   | 56            | 77       | 100       |            | ACT   | 24            | 3        | 0         |
| Gly        | GGT   | 28            | 19       | 0         |            | ACC   | 32            | 60       | 100       |
|            | GGC   | 31            | 52       | 100       | ACA        | 24    | 1             | 0        |           |
|            | GGA   | 24            | 9        | 0         | ACG        | 20    | 36            | 0        |           |
|            | GGG   | 17            | 20       | 0         | Trp        | TGG   | 100           | 100      | 100       |
| His        | CAT   | 47            | 7        | 100       |            | Tyr   | TAT           | 47       | 5         |
|            | CAC   | 53            | 93       | 0         | Val        | TAC   | 53            | 95       | 100       |
| Ile        | ATT   | 36            | 1        | 0         |            | GTT   | 27            | 4        | 0         |
|            | ATC   | 50            | 97       | 100       |            | GTC   | 33            | 44       | 100       |
| Leu        | ATA   | 14            | 2        | 0         |            | GTA   | 13            | 0        | 0         |
|            | TTA   | 7             | 0        | 0         |            | GTG   | 27            | 52       | 0         |
|            | TTG   | 18            | 7        | 0         |            |       |               |          |           |

</

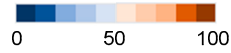

**Table S2** Comparison of codon usage in *A. oryzae* genes with that in native and codon-optimized *pccABE* genes.

| Amino acid | Codon | Frequency (%)                                                                                                                                                                                                                                                                                                                                                                                                                                                                                                                                                                                                                                                                                                                                                                                                                                                                                                                                                                                                                                                                                                                                                                                                                                                                                                                                                                                                                                                                                                                                                                                                                                                                                                                                                                                                                                                                                                                                                                                                                                                                                                                                                                                                                                                                                                                                                                                                                                                                                                                                                                                                                                                                                                                                                                                                                                                                                                                                                                                                                                                                                                                                                                                                                                                                                                                                                                                                                                                                                                                                                                                                                                                                                                                                                                                                                                                                                                                                                                                                                                                                                                                                                                                                                                                                                                                                                                                                                                                                                                                                                                                                                                                                                                                                                                                                                                                                                                                                                                                                                                                                                                                                                                                                                                                                                                                                                                                                                                                                                                                                                                                                                                                                                                                                                                                                                        |             |           |             |           |             |           |  |
|------------|-------|--------------------------------------------------------------------------------------------------------------------------------------------------------------------------------------------------------------------------------------------------------------------------------------------------------------------------------------------------------------------------------------------------------------------------------------------------------------------------------------------------------------------------------------------------------------------------------------------------------------------------------------------------------------------------------------------------------------------------------------------------------------------------------------------------------------------------------------------------------------------------------------------------------------------------------------------------------------------------------------------------------------------------------------------------------------------------------------------------------------------------------------------------------------------------------------------------------------------------------------------------------------------------------------------------------------------------------------------------------------------------------------------------------------------------------------------------------------------------------------------------------------------------------------------------------------------------------------------------------------------------------------------------------------------------------------------------------------------------------------------------------------------------------------------------------------------------------------------------------------------------------------------------------------------------------------------------------------------------------------------------------------------------------------------------------------------------------------------------------------------------------------------------------------------------------------------------------------------------------------------------------------------------------------------------------------------------------------------------------------------------------------------------------------------------------------------------------------------------------------------------------------------------------------------------------------------------------------------------------------------------------------------------------------------------------------------------------------------------------------------------------------------------------------------------------------------------------------------------------------------------------------------------------------------------------------------------------------------------------------------------------------------------------------------------------------------------------------------------------------------------------------------------------------------------------------------------------------------------------------------------------------------------------------------------------------------------------------------------------------------------------------------------------------------------------------------------------------------------------------------------------------------------------------------------------------------------------------------------------------------------------------------------------------------------------------------------------------------------------------------------------------------------------------------------------------------------------------------------------------------------------------------------------------------------------------------------------------------------------------------------------------------------------------------------------------------------------------------------------------------------------------------------------------------------------------------------------------------------------------------------------------------------------------------------------------------------------------------------------------------------------------------------------------------------------------------------------------------------------------------------------------------------------------------------------------------------------------------------------------------------------------------------------------------------------------------------------------------------------------------------------------------------------------------------------------------------------------------------------------------------------------------------------------------------------------------------------------------------------------------------------------------------------------------------------------------------------------------------------------------------------------------------------------------------------------------------------------------------------------------------------------------------------------------------------------------------------------------------------------------------------------------------------------------------------------------------------------------------------------------------------------------------------------------------------------------------------------------------------------------------------------------------------------------------------------------------------------------------------------------------------------------------------------------------------------------------------------|-------------|-----------|-------------|-----------|-------------|-----------|--|
|            |       | <i>A. oryzae</i>                                                                                                                                                                                                                                                                                                                                                                                                                                                                                                                                                                                                                                                                                                                                                                                                                                                                                                                                                                                                                                                                                                                                                                                                                                                                                                                                                                                                                                                                                                                                                                                                                                                                                                                                                                                                                                                                                                                                                                                                                                                                                                                                                                                                                                                                                                                                                                                                                                                                                                                                                                                                                                                                                                                                                                                                                                                                                                                                                                                                                                                                                                                                                                                                                                                                                                                                                                                                                                                                                                                                                                                                                                                                                                                                                                                                                                                                                                                                                                                                                                                                                                                                                                                                                                                                                                                                                                                                                                                                                                                                                                                                                                                                                                                                                                                                                                                                                                                                                                                                                                                                                                                                                                                                                                                                                                                                                                                                                                                                                                                                                                                                                                                                                                                                                                                                                     | <i>pccA</i> |           | <i>pccB</i> |           | <i>pccE</i> |           |  |
|            |       |                                                                                                                                                                                                                                                                                                                                                                                                                                                                                                                                                                                                                                                                                                                                                                                                                                                                                                                                                                                                                                                                                                                                                                                                                                                                                                                                                                                                                                                                                                                                                                                                                                                                                                                                                                                                                                                                                                                                                                                                                                                                                                                                                                                                                                                                                                                                                                                                                                                                                                                                                                                                                                                                                                                                                                                                                                                                                                                                                                                                                                                                                                                                                                                                                                                                                                                                                                                                                                                                                                                                                                                                                                                                                                                                                                                                                                                                                                                                                                                                                                                                                                                                                                                                                                                                                                                                                                                                                                                                                                                                                                                                                                                                                                                                                                                                                                                                                                                                                                                                                                                                                                                                                                                                                                                                                                                                                                                                                                                                                                                                                                                                                                                                                                                                                                                                                                      | Native      | Optimized | Native      | Optimized | Native      | Optimized |  |
| Ala        | GCG   | 20                                                                                                                                                                                                                                                                                                                                                                                                                                                                                                                                                                                                                                                                                                                                                                                                                                                                                                                                                                                                                                                                                                                                                                                                                                                                                                                                                                                                                                                                                                                                                                                                                                                                                                                                                                                                                                                                                                                                                                                                                                                                                                                                                                                                                                                                                                                                                                                                                                                                                                                                                                                                                                                                                                                                                                                                                                                                                                                                                                                                                                                                                                                                                                                                                                                                                                                                                                                                                                                                                                                                                                                                                                                                                                                                                                                                                                                                                                                                                                                                                                                                                                                                                                                                                                                                                                                                                                                                                                                                                                                                                                                                                                                                                                                                                                                                                                                                                                                                                                                                                                                                                                                                                                                                                                                                                                                                                                                                                                                                                                                                                                                                                                                                                                                                                                                                                                   | 18          | 0         | 26          | 0         | 27          | 0         |  |
|            | GCA   | 23                                                                                                                                                                                                                                                                                                                                                                                                                                                                                                                                                                                                                                                                                                                                                                                                                                                                                                                                                                                                                                                                                                                                                                                                                                                                                                                                                                                                                                                                                                                                                                                                                                                                                                                                                                                                                                                                                                                                                                                                                                                                                                                                                                                                                                                                                                                                                                                                                                                                                                                                                                                                                                                                                                                                                                                                                                                                                                                                                                                                                                                                                                                                                                                                                                                                                                                                                                                                                                                                                                                                                                                                                                                                                                                                                                                                                                                                                                                                                                                                                                                                                                                                                                                                                                                                                                                                                                                                                                                                                                                                                                                                                                                                                                                                                                                                                                                                                                                                                                                                                                                                                                                                                                                                                                                                                                                                                                                                                                                                                                                                                                                                                                                                                                                                                                                                                                   | 1           | 0         | 2           | 0         | 9           | 0         |  |
|            | GCT   | 27                                                                                                                                                                                                                                                                                                                                                                                                                                                                                                                                                                                                                                                                                                                                                                                                                                                                                                                                                                                                                                                                                                                                                                                                                                                                                                                                                                                                                                                                                                                                                                                                                                                                                                                                                                                                                                                                                                                                                                                                                                                                                                                                                                                                                                                                                                                                                                                                                                                                                                                                                                                                                                                                                                                                                                                                                                                                                                                                                                                                                                                                                                                                                                                                                                                                                                                                                                                                                                                                                                                                                                                                                                                                                                                                                                                                                                                                                                                                                                                                                                                                                                                                                                                                                                                                                                                                                                                                                                                                                                                                                                                                                                                                                                                                                                                                                                                                                                                                                                                                                                                                                                                                                                                                                                                                                                                                                                                                                                                                                                                                                                                                                                                                                                                                                                                                                                   | 2           | 0         | 2           | 0         | 0           | 0         |  |
|            | GCC   | 31                                                                                                                                                                                                                                                                                                                                                                                                                                                                                                                                                                                                                                                                                                                                                                                                                                                                                                                                                                                                                                                                                                                                                                                                                                                                                                                                                                                                                                                                                                                                                                                                                                                                                                                                                                                                                                                                                                                                                                                                                                                                                                                                                                                                                                                                                                                                                                                                                                                                                                                                                                                                                                                                                                                                                                                                                                                                                                                                                                                                                                                                                                                                                                                                                                                                                                                                                                                                                                                                                                                                                                                                                                                                                                                                                                                                                                                                                                                                                                                                                                                                                                                                                                                                                                                                                                                                                                                                                                                                                                                                                                                                                                                                                                                                                                                                                                                                                                                                                                                                                                                                                                                                                                                                                                                                                                                                                                                                                                                                                                                                                                                                                                                                                                                                                                                                                                   | 78          | 100       | 71          | 100       | 64          | 100       |  |
| Arg        | CGT   | 18                                                                                                                                                                                                                                                                                                                                                                                                                                                                                                                                                                                                                                                                                                                                                                                                                                                                                                                                                                                                                                                                                                                                                                                                                                                                                                                                                                                                                                                                                                                                                                                                                                                                                                                                                                                                                                                                                                                                                                                                                                                                                                                                                                                                                                                                                                                                                                                                                                                                                                                                                                                                                                                                                                                                                                                                                                                                                                                                                                                                                                                                                                                                                                                                                                                                                                                                                                                                                                                                                                                                                                                                                                                                                                                                                                                                                                                                                                                                                                                                                                                                                                                                                                                                                                                                                                                                                                                                                                                                                                                                                                                                                                                                                                                                                                                                                                                                                                                                                                                                                                                                                                                                                                                                                                                                                                                                                                                                                                                                                                                                                                                                                                                                                                                                                                                                                                   | 7           | 0         | 6           | 0         | 0           | 0         |  |
|            | CGC   | 23                                                                                                                                                                                                                                                                                                                                                                                                                                                                                                                                                                                                                                                                                                                                                                                                                                                                                                                                                                                                                                                                                                                                                                                                                                                                                                                                                                                                                                                                                                                                                                                                                                                                                                                                                                                                                                                                                                                                                                                                                                                                                                                                                                                                                                                                                                                                                                                                                                                                                                                                                                                                                                                                                                                                                                                                                                                                                                                                                                                                                                                                                                                                                                                                                                                                                                                                                                                                                                                                                                                                                                                                                                                                                                                                                                                                                                                                                                                                                                                                                                                                                                                                                                                                                                                                                                                                                                                                                                                                                                                                                                                                                                                                                                                                                                                                                                                                                                                                                                                                                                                                                                                                                                                                                                                                                                                                                                                                                                                                                                                                                                                                                                                                                                                                                                                                                                   | 76          | 100       | 84          | 100       | 67          | 100       |  |
|            | CGA   | 17                                                                                                                                                                                                                                                                                                                                                                                                                                                                                                                                                                                                                                                                                                                                                                                                                                                                                                                                                                                                                                                                                                                                                                                                                                                                                                                                                                                                                                                                                                                                                                                                                                                                                                                                                                                                                                                                                                                                                                                                                                                                                                                                                                                                                                                                                                                                                                                                                                                                                                                                                                                                                                                                                                                                                                                                                                                                                                                                                                                                                                                                                                                                                                                                                                                                                                                                                                                                                                                                                                                                                                                                                                                                                                                                                                                                                                                                                                                                                                                                                                                                                                                                                                                                                                                                                                                                                                                                                                                                                                                                                                                                                                                                                                                                                                                                                                                                                                                                                                                                                                                                                                                                                                                                                                                                                                                                                                                                                                                                                                                                                                                                                                                                                                                                                                                                                                   | 0           | 0         | 0           | 0         | 0           | 0         |  |
|            | CGG   | 18                                                                                                                                                                                                                                                                                                                                                                                                                                                                                                                                                                                                                                                                                                                                                                                                                                                                                                                                                                                                                                                                                                                                                                                                                                                                                                                                                                                                                                                                                                                                                                                                                                                                                                                                                                                                                                                                                                                                                                                                                                                                                                                                                                                                                                                                                                                                                                                                                                                                                                                                                                                                                                                                                                                                                                                                                                                                                                                                                                                                                                                                                                                                                                                                                                                                                                                                                                                                                                                                                                                                                                                                                                                                                                                                                                                                                                                                                                                                                                                                                                                                                                                                                                                                                                                                                                                                                                                                                                                                                                                                                                                                                                                                                                                                                                                                                                                                                                                                                                                                                                                                                                                                                                                                                                                                                                                                                                                                                                                                                                                                                                                                                                                                                                                                                                                                                                   | 14          | 0         | 6           | 0         | 17          | 0         |  |
|            | AGA   | 13                                                                                                                                                                                                                                                                                                                                                                                                                                                                                                                                                                                                                                                                                                                                                                                                                                                                                                                                                                                                                                                                                                                                                                                                                                                                                                                                                                                                                                                                                                                                                                                                                                                                                                                                                                                                                                                                                                                                                                                                                                                                                                                                                                                                                                                                                                                                                                                                                                                                                                                                                                                                                                                                                                                                                                                                                                                                                                                                                                                                                                                                                                                                                                                                                                                                                                                                                                                                                                                                                                                                                                                                                                                                                                                                                                                                                                                                                                                                                                                                                                                                                                                                                                                                                                                                                                                                                                                                                                                                                                                                                                                                                                                                                                                                                                                                                                                                                                                                                                                                                                                                                                                                                                                                                                                                                                                                                                                                                                                                                                                                                                                                                                                                                                                                                                                                                                   | 0           | 0         | 0           | 0         | 17          | 0         |  |
|            | AGG   | 12                                                                                                                                                                                                                                                                                                                                                                                                                                                                                                                                                                                                                                                                                                                                                                                                                                                                                                                                                                                                                                                                                                                                                                                                                                                                                                                                                                                                                                                                                                                                                                                                                                                                                                                                                                                                                                                                                                                                                                                                                                                                                                                                                                                                                                                                                                                                                                                                                                                                                                                                                                                                                                                                                                                                                                                                                                                                                                                                                                                                                                                                                                                                                                                                                                                                                                                                                                                                                                                                                                                                                                                                                                                                                                                                                                                                                                                                                                                                                                                                                                                                                                                                                                                                                                                                                                                                                                                                                                                                                                                                                                                                                                                                                                                                                                                                                                                                                                                                                                                                                                                                                                                                                                                                                                                                                                                                                                                                                                                                                                                                                                                                                                                                                                                                                                                                                                   | 2           | 0         | 3           | 0         | 0           | 0         |  |
| Asn        | AAT   | 45                                                                                                                                                                                                                                                                                                                                                                                                                                                                                                                                                                                                                                                                                                                                                                                                                                                                                                                                                                                                                                                                                                                                                                                                                                                                                                                                                                                                                                                                                                                                                                                                                                                                                                                                                                                                                                                                                                                                                                                                                                                                                                                                                                                                                                                                                                                                                                                                                                                                                                                                                                                                                                                                                                                                                                                                                                                                                                                                                                                                                                                                                                                                                                                                                                                                                                                                                                                                                                                                                                                                                                                                                                                                                                                                                                                                                                                                                                                                                                                                                                                                                                                                                                                                                                                                                                                                                                                                                                                                                                                                                                                                                                                                                                                                                                                                                                                                                                                                                                                                                                                                                                                                                                                                                                                                                                                                                                                                                                                                                                                                                                                                                                                                                                                                                                                                                                   | 14          | 0         | 0           | 0         | 0           | 0         |  |
|            | AAC   | 55                                                                                                                                                                                                                                                                                                                                                                                                                                                                                                                                                                                                                                                                                                                                                                                                                                                                                                                                                                                                                                                                                                                                                                                                                                                                                                                                                                                                                                                                                                                                                                                                                                                                                                                                                                                                                                                                                                                                                                                                                                                                                                                                                                                                                                                                                                                                                                                                                                                                                                                                                                                                                                                                                                                                                                                                                                                                                                                                                                                                                                                                                                                                                                                                                                                                                                                                                                                                                                                                                                                                                                                                                                                                                                                                                                                                                                                                                                                                                                                                                                                                                                                                                                                                                                                                                                                                                                                                                                                                                                                                                                                                                                                                                                                                                                                                                                                                                                                                                                                                                                                                                                                                                                                                                                                                                                                                                                                                                                                                                                                                                                                                                                                                                                                                                                                                                                   | 86          | 100       | 100         | 100       | 100         | 100       |  |
| Asp        | GAT   | 53                                                                                                                                                                                                                                                                                                                                                                                                                                                                                                                                                                                                                                                                                                                                                                                                                                                                                                                                                                                                                                                                                                                                                                                                                                                                                                                                                                                                                                                                                                                                                                                                                                                                                                                                                                                                                                                                                                                                                                                                                                                                                                                                                                                                                                                                                                                                                                                                                                                                                                                                                                                                                                                                                                                                                                                                                                                                                                                                                                                                                                                                                                                                                                                                                                                                                                                                                                                                                                                                                                                                                                                                                                                                                                                                                                                                                                                                                                                                                                                                                                                                                                                                                                                                                                                                                                                                                                                                                                                                                                                                                                                                                                                                                                                                                                                                                                                                                                                                                                                                                                                                                                                                                                                                                                                                                                                                                                                                                                                                                                                                                                                                                                                                                                                                                                                                                                   | 6           | 100       | 3           | 100       | 0           | 100       |  |
|            | GAC   | 47                                                                                                                                                                                                                                                                                                                                                                                                                                                                                                                                                                                                                                                                                                                                                                                                                                                                                                                                                                                                                                                                                                                                                                                                                                                                                                                                                                                                                                                                                                                                                                                                                                                                                                                                                                                                                                                                                                                                                                                                                                                                                                                                                                                                                                                                                                                                                                                                                                                                                                                                                                                                                                                                                                                                                                                                                                                                                                                                                                                                                                                                                                                                                                                                                                                                                                                                                                                                                                                                                                                                                                                                                                                                                                                                                                                                                                                                                                                                                                                                                                                                                                                                                                                                                                                                                                                                                                                                                                                                                                                                                                                                                                                                                                                                                                                                                                                                                                                                                                                                                                                                                                                                                                                                                                                                                                                                                                                                                                                                                                                                                                                                                                                                                                                                                                                                                                   | 94          | 0         | 97          | 0         | 100         | 0         |  |
| Cys        | TGT   | 46                                                                                                                                                                                                                                                                                                                                                                                                                                                                                                                                                                                                                                                                                                                                                                                                                                                                                                                                                                                                                                                                                                                                                                                                                                                                                                                                                                                                                                                                                                                                                                                                                                                                                                                                                                                                                                                                                                                                                                                                                                                                                                                                                                                                                                                                                                                                                                                                                                                                                                                                                                                                                                                                                                                                                                                                                                                                                                                                                                                                                                                                                                                                                                                                                                                                                                                                                                                                                                                                                                                                                                                                                                                                                                                                                                                                                                                                                                                                                                                                                                                                                                                                                                                                                                                                                                                                                                                                                                                                                                                                                                                                                                                                                                                                                                                                                                                                                                                                                                                                                                                                                                                                                                                                                                                                                                                                                                                                                                                                                                                                                                                                                                                                                                                                                                                                                                   | 0           | 0         | 25          | 0         | 0           | 0         |  |
|            | TGC   | 54                                                                                                                                                                                                                                                                                                                                                                                                                                                                                                                                                                                                                                                                                                                                                                                                                                                                                                                                                                                                                                                                                                                                                                                                                                                                                                                                                                                                                                                                                                                                                                                                                                                                                                                                                                                                                                                                                                                                                                                                                                                                                                                                                                                                                                                                                                                                                                                                                                                                                                                                                                                                                                                                                                                                                                                                                                                                                                                                                                                                                                                                                                                                                                                                                                                                                                                                                                                                                                                                                                                                                                                                                                                                                                                                                                                                                                                                                                                                                                                                                                                                                                                                                                                                                                                                                                                                                                                                                                                                                                                                                                                                                                                                                                                                                                                                                                                                                                                                                                                                                                                                                                                                                                                                                                                                                                                                                                                                                                                                                                                                                                                                                                                                                                                                                                                                                                   | 100         | 100       | 75          | 100       | 0           | 0         |  |
| Gln        | CAA   | 43                                                                                                                                                                                                                                                                                                                                                                                                                                                                                                                                                                                                                                                                                                                                                                                                                                                                                                                                                                                                                                                                                                                                                                                                                                                                                                                                                                                                                                                                                                                                                                                                                                                                                                                                                                                                                                                                                                                                                                                                                                                                                                                                                                                                                                                                                                                                                                                                                                                                                                                                                                                                                                                                                                                                                                                                                                                                                                                                                                                                                                                                                                                                                                                                                                                                                                                                                                                                                                                                                                                                                                                                                                                                                                                                                                                                                                                                                                                                                                                                                                                                                                                                                                                                                                                                                                                                                                                                                                                                                                                                                                                                                                                                                                                                                                                                                                                                                                                                                                                                                                                                                                                                                                                                                                                                                                                                                                                                                                                                                                                                                                                                                                                                                                                                                                                                                                   | 8           | 0         | 11          | 0         | 0           | 0         |  |
|            | CAG   | 57                                                                                                                                                                                                                                                                                                                                                                                                                                                                                                                                                                                                                                                                                                                                                                                                                                                                                                                                                                                                                                                                                                                                                                                                                                                                                                                                                                                                                                                                                                                                                                                                                                                                                                                                                                                                                                                                                                                                                                                                                                                                                                                                                                                                                                                                                                                                                                                                                                                                                                                                                                                                                                                                                                                                                                                                                                                                                                                                                                                                                                                                                                                                                                                                                                                                                                                                                                                                                                                                                                                                                                                                                                                                                                                                                                                                                                                                                                                                                                                                                                                                                                                                                                                                                                                                                                                                                                                                                                                                                                                                                                                                                                                                                                                                                                                                                                                                                                                                                                                                                                                                                                                                                                                                                                                                                                                                                                                                                                                                                                                                                                                                                                                                                                                                                                                                                                   | 92          | 100       | 89          | 100       | 0           | 0         |  |
| Glu        | GAA   | 44                                                                                                                                                                                                                                                                                                                                                                                                                                                                                                                                                                                                                                                                                                                                                                                                                                                                                                                                                                                                                                                                                                                                                                                                                                                                                                                                                                                                                                                                                                                                                                                                                                                                                                                                                                                                                                                                                                                                                                                                                                                                                                                                                                                                                                                                                                                                                                                                                                                                                                                                                                                                                                                                                                                                                                                                                                                                                                                                                                                                                                                                                                                                                                                                                                                                                                                                                                                                                                                                                                                                                                                                                                                                                                                                                                                                                                                                                                                                                                                                                                                                                                                                                                                                                                                                                                                                                                                                                                                                                                                                                                                                                                                                                                                                                                                                                                                                                                                                                                                                                                                                                                                                                                                                                                                                                                                                                                                                                                                                                                                                                                                                                                                                                                                                                                                                                                   | 20          | 0         | 11          | 0         | 67          | 0         |  |
|            | GAG   | 56                                                                                                                                                                                                                                                                                                                                                                                                                                                                                                                                                                                                                                                                                                                                                                                                                                                                                                                                                                                                                                                                                                                                                                                                                                                                                                                                                                                                                                                                                                                                                                                                                                                                                                                                                                                                                                                                                                                                                                                                                                                                                                                                                                                                                                                                                                                                                                                                                                                                                                                                                                                                                                                                                                                                                                                                                                                                                                                                                                                                                                                                                                                                                                                                                                                                                                                                                                                                                                                                                                                                                                                                                                                                                                                                                                                                                                                                                                                                                                                                                                                                                                                                                                                                                                                                                                                                                                                                                                                                                                                                                                                                                                                                                                                                                                                                                                                                                                                                                                                                                                                                                                                                                                                                                                                                                                                                                                                                                                                                                                                                                                                                                                                                                                                                                                                                                                   | 80          | 100       | 89          | 100       | 33          | 100       |  |
| Gly        | GGT   | 28                                                                                                                                                                                                                                                                                                                                                                                                                                                                                                                                                                                                                                                                                                                                                                                                                                                                                                                                                                                                                                                                                                                                                                                                                                                                                                                                                                                                                                                                                                                                                                                                                                                                                                                                                                                                                                                                                                                                                                                                                                                                                                                                                                                                                                                                                                                                                                                                                                                                                                                                                                                                                                                                                                                                                                                                                                                                                                                                                                                                                                                                                                                                                                                                                                                                                                                                                                                                                                                                                                                                                                                                                                                                                                                                                                                                                                                                                                                                                                                                                                                                                                                                                                                                                                                                                                                                                                                                                                                                                                                                                                                                                                                                                                                                                                                                                                                                                                                                                                                                                                                                                                                                                                                                                                                                                                                                                                                                                                                                                                                                                                                                                                                                                                                                                                                                                                   | 5           | 0         | 8           | 0         | 0           | 0         |  |
|            | GGC   | 31                                                                                                                                                                                                                                                                                                                                                                                                                                                                                                                                                                                                                                                                                                                                                                                                                                                                                                                                                                                                                                                                                                                                                                                                                                                                                                                                                                                                                                                                                                                                                                                                                                                                                                                                                                                                                                                                                                                                                                                                                                                                                                                                                                                                                                                                                                                                                                                                                                                                                                                                                                                                                                                                                                                                                                                                                                                                                                                                                                                                                                                                                                                                                                                                                                                                                                                                                                                                                                                                                                                                                                                                                                                                                                                                                                                                                                                                                                                                                                                                                                                                                                                                                                                                                                                                                                                                                                                                                                                                                                                                                                                                                                                                                                                                                                                                                                                                                                                                                                                                                                                                                                                                                                                                                                                                                                                                                                                                                                                                                                                                                                                                                                                                                                                                                                                                                                   | 88          | 100       | 92          | 100       | 100         | 100       |  |
|            | GGA   | 24                                                                                                                                                                                                                                                                                                                                                                                                                                                                                                                                                                                                                                                                                                                                                                                                                                                                                                                                                                                                                                                                                                                                                                                                                                                                                                                                                                                                                                                                                                                                                                                                                                                                                                                                                                                                                                                                                                                                                                                                                                                                                                                                                                                                                                                                                                                                                                                                                                                                                                                                                                                                                                                                                                                                                                                                                                                                                                                                                                                                                                                                                                                                                                                                                                                                                                                                                                                                                                                                                                                                                                                                                                                                                                                                                                                                                                                                                                                                                                                                                                                                                                                                                                                                                                                                                                                                                                                                                                                                                                                                                                                                                                                                                                                                                                                                                                                                                                                                                                                                                                                                                                                                                                                                                                                                                                                                                                                                                                                                                                                                                                                                                                                                                                                                                                                                                                   | 0           | 0         | 0           | 0         | 0           | 0         |  |
|            | GGG   | 17                                                                                                                                                                                                                                                                                                                                                                                                                                                                                                                                                                                                                                                                                                                                                                                                                                                                                                                                                                                                                                                                                                                                                                                                                                                                                                                                                                                                                                                                                                                                                                                                                                                                                                                                                                                                                                                                                                                                                                                                                                                                                                                                                                                                                                                                                                                                                                                                                                                                                                                                                                                                                                                                                                                                                                                                                                                                                                                                                                                                                                                                                                                                                                                                                                                                                                                                                                                                                                                                                                                                                                                                                                                                                                                                                                                                                                                                                                                                                                                                                                                                                                                                                                                                                                                                                                                                                                                                                                                                                                                                                                                                                                                                                                                                                                                                                                                                                                                                                                                                                                                                                                                                                                                                                                                                                                                                                                                                                                                                                                                                                                                                                                                                                                                                                                                                                                   | 7           | 0         | 0           | 0         | 0           | 0         |  |
| His        | CAT   | 47                                                                                                                                                                                                                                                                                                                                                                                                                                                                                                                                                                                                                                                                                                                                                                                                                                                                                                                                                                                                                                                                                                                                                                                                                                                                                                                                                                                                                                                                                                                                                                                                                                                                                                                                                                                                                                                                                                                                                                                                                                                                                                                                                                                                                                                                                                                                                                                                                                                                                                                                                                                                                                                                                                                                                                                                                                                                                                                                                                                                                                                                                                                                                                                                                                                                                                                                                                                                                                                                                                                                                                                                                                                                                                                                                                                                                                                                                                                                                                                                                                                                                                                                                                                                                                                                                                                                                                                                                                                                                                                                                                                                                                                                                                                                                                                                                                                                                                                                                                                                                                                                                                                                                                                                                                                                                                                                                                                                                                                                                                                                                                                                                                                                                                                                                                                                                                   | 0           | 100       | 0           | 100       | 0           | 100       |  |
|            | CAC   | 53                                                                                                                                                                                                                                                                                                                                                                                                                                                                                                                                                                                                                                                                                                                                                                                                                                                                                                                                                                                                                                                                                                                                                                                                                                                                                                                                                                                                                                                                                                                                                                                                                                                                                                                                                                                                                                                                                                                                                                                                                                                                                                                                                                                                                                                                                                                                                                                                                                                                                                                                                                                                                                                                                                                                                                                                                                                                                                                                                                                                                                                                                                                                                                                                                                                                                                                                                                                                                                                                                                                                                                                                                                                                                                                                                                                                                                                                                                                                                                                                                                                                                                                                                                                                                                                                                                                                                                                                                                                                                                                                                                                                                                                                                                                                                                                                                                                                                                                                                                                                                                                                                                                                                                                                                                                                                                                                                                                                                                                                                                                                                                                                                                                                                                                                                                                                                                   | 100         | 0         | 100         | 0         | 100         | 0         |  |
| Ile        | ATT   | 36                                                                                                                                                                                                                                                                                                                                                                                                                                                                                                                                                                                                                                                                                                                                                                                                                                                                                                                                                                                                                                                                                                                                                                                                                                                                                                                                                                                                                                                                                                                                                                                                                                                                                                                                                                                                                                                                                                                                                                                                                                                                                                                                                                                                                                                                                                                                                                                                                                                                                                                                                                                                                                                                                                                                                                                                                                                                                                                                                                                                                                                                                                                                                                                                                                                                                                                                                                                                                                                                                                                                                                                                                                                                                                                                                                                                                                                                                                                                                                                                                                                                                                                                                                                                                                                                                                                                                                                                                                                                                                                                                                                                                                                                                                                                                                                                                                                                                                                                                                                                                                                                                                                                                                                                                                                                                                                                                                                                                                                                                                                                                                                                                                                                                                                                                                                                                                   | 0           | 0         | 0           | 0         | 0           | 0         |  |
|            | ATC   | 50                                                                                                                                                                                                                                                                                                                                                                                                                                                                                                                                                                                                                                                                                                                                                                                                                                                                                                                                                                                                                                                                                                                                                                                                                                                                                                                                                                                                                                                                                                                                                                                                                                                                                                                                                                                                                                                                                                                                                                                                                                                                                                                                                                                                                                                                                                                                                                                                                                                                                                                                                                                                                                                                                                                                                                                                                                                                                                                                                                                                                                                                                                                                                                                                                                                                                                                                                                                                                                                                                                                                                                                                                                                                                                                                                                                                                                                                                                                                                                                                                                                                                                                                                                                                                                                                                                                                                                                                                                                                                                                                                                                                                                                                                                                                                                                                                                                                                                                                                                                                                                                                                                                                                                                                                                                                                                                                                                                                                                                                                                                                                                                                                                                                                                                                                                                                                                   | 96          | 100       | 100         | 100       | 100         | 100       |  |
|            | ATA   | 14                                                                                                                                                                                                                                                                                                                                                                                                                                                                                                                                                                                                                                                                                                                                                                                                                                                                                                                                                                                                                                                                                                                                                                                                                                                                                                                                                                                                                                                                                                                                                                                                                                                                                                                                                                                                                                                                                                                                                                                                                                                                                                                                                                                                                                                                                                                                                                                                                                                                                                                                                                                                                                                                                                                                                                                                                                                                                                                                                                                                                                                                                                                                                                                                                                                                                                                                                                                                                                                                                                                                                                                                                                                                                                                                                                                                                                                                                                                                                                                                                                                                                                                                                                                                                                                                                                                                                                                                                                                                                                                                                                                                                                                                                                                                                                                                                                                                                                                                                                                                                                                                                                                                                                                                                                                                                                                                                                                                                                                                                                                                                                                                                                                                                                                                                                                                                                   | 4           | 0         | 0           | 0         | 0           | 0         |  |
| Leu        | TTA   | 7                                                                                                                                                                                                                                                                                                                                                                                                                                                                                                                                                                                                                                                                                                                                                                                                                                                                                                                                                                                                                                                                                                                                                                                                                                                                                                                                                                                                                                                                                                                                                                                                                                                                                                                                                                                                                                                                                                                                                                                                                                                                                                                                                                                                                                                                                                                                                                                                                                                                                                                                                                                                                                                                                                                                                                                                                                                                                                                                                                                                                                                                                                                                                                                                                                                                                                                                                                                                                                                                                                                                                                                                                                                                                                                                                                                                                                                                                                                                                                                                                                                                                                                                                                                                                                                                                                                                                                                                                                                                                                                                                                                                                                                                                                                                                                                                                                                                                                                                                                                                                                                                                                                                                                                                                                                                                                                                                                                                                                                                                                                                                                                                                                                                                                                                                                                                                                    | 0           | 0         | 0           | 0         | 0           | 0         |  |
|            | TTG   | 18                                                                                                                                                                                                                                                                                                                                                                                                                                                                                                                                                                                                                                                                                                                                                                                                                                                                                                                                                                                                                                                                                                                                                                                                                                                                                                                                                                                                                                                                                                                                                                                                                                                                                                                                                                                                                                                                                                                                                                                                                                                                                                                                                                                                                                                                                                                                                                                                                                                                                                                                                                                                                                                                                                                                                                                                                                                                                                                                                                                                                                                                                                                                                                                                                                                                                                                                                                                                                                                                                                                                                                                                                                                                                                                                                                                                                                                                                                                                                                                                                                                                                                                                                                                                                                                                                                                                                                                                                                                                                                                                                                                                                                                                                                                                                                                                                                                                                                                                                                                                                                                                                                                                                                                                                                                                                                                                                                                                                                                                                                                                                                                                                                                                                                                                                                                                                                   | 2           | 0         | 0           | 0         | 0           | 0         |  |
|            | CTT   | 19                                                                                                                                                                                                                                                                                                                                                                                                                                                                                                                                                                                                                                                                                                                                                                                                                                                                                                                                                                                                                                                                                                                                                                                                                                                                                                                                                                                                                                                                                                                                                                                                                                                                                                                                                                                                                                                                                                                                                                                                                                                                                                                                                                                                                                                                                                                                                                                                                                                                                                                                                                                                                                                                                                                                                                                                                                                                                                                                                                                                                                                                                                                                                                                                                                                                                                                                                                                                                                                                                                                                                                                                                                                                                                                                                                                                                                                                                                                                                                                                                                                                                                                                                                                                                                                                                                                                                                                                                                                                                                                                                                                                                                                                                                                                                                                                                                                                                                                                                                                                                                                                                                                                                                                                                                                                                                                                                                                                                                                                                                                                                                                                                                                                                                                                                                                                                                   | 0           | 0         | 0           | 0         | 0           | 0         |  |
|            | CTC   | 23                                                                                                                                                                                                                                                                                                                                                                                                                                                                                                                                                                                                                                                                                                                                                                                                                                                                                                                                                                                                                                                                                                                                                                                                                                                                                                                                                                                                                                                                                                                                                                                                                                                                                                                                                                                                                                                                                                                                                                                                                                                                                                                                                                                                                                                                                                                                                                                                                                                                                                                                                                                                                                                                                                                                                                                                                                                                                                                                                                                                                                                                                                                                                                                                                                                                                                                                                                                                                                                                                                                                                                                                                                                                                                                                                                                                                                                                                                                                                                                                                                                                                                                                                                                                                                                                                                                                                                                                                                                                                                                                                                                                                                                                                                                                                                                                                                                                                                                                                                                                                                                                                                                                                                                                                                                                                                                                                                                                                                                                                                                                                                                                                                                                                                                                                                                                                                   | 52          | 100       | 47          | 100       | 0           | 100       |  |
|            | CTA   | 11                                                                                                                                                                                                                                                                                                                                                                                                                                                                                                                                                                                                                                                                                                                                                                                                                                                                                                                                                                                                                                                                                                                                                                                                                                                                                                                                                                                                                                                                                                                                                                                                                                                                                                                                                                                                                                                                                                                                                                                                                                                                                                                                                                                                                                                                                                                                                                                                                                                                                                                                                                                                                                                                                                                                                                                                                                                                                                                                                                                                                                                                                                                                                                                                                                                                                                                                                                                                                                                                                                                                                                                                                                                                                                                                                                                                                                                                                                                                                                                                                                                                                                                                                                                                                                                                                                                                                                                                                                                                                                                                                                                                                                                                                                                                                                                                                                                                                                                                                                                                                                                                                                                                                                                                                                                                                                                                                                                                                                                                                                                                                                                                                                                                                                                                                                                                                                   | 0           | 0         | 0           | 0         | 0           | 0         |  |
|            | CTG   | 22                                                                                                                                                                                                                                                                                                                                                                                                                                                                                                                                                                                                                                                                                                                                                                                                                                                                                                                                                                                                                                                                                                                                                                                                                                                                                                                                                                                                                                                                                                                                                                                                                                                                                                                                                                                                                                                                                                                                                                                                                                                                                                                                                                                                                                                                                                                                                                                                                                                                                                                                                                                                                                                                                                                                                                                                                                                                                                                                                                                                                                                                                                                                                                                                                                                                                                                                                                                                                                                                                                                                                                                                                                                                                                                                                                                                                                                                                                                                                                                                                                                                                                                                                                                                                                                                                                                                                                                                                                                                                                                                                                                                                                                                                                                                                                                                                                                                                                                                                                                                                                                                                                                                                                                                                                                                                                                                                                                                                                                                                                                                                                                                                                                                                                                                                                                                                                   | 46          | 0         | 53          | 0         | 100         | 0         |  |
| Lys        | AAA   | 36                                                                                                                                                                                                                                                                                                                                                                                                                                                                                                                                                                                                                                                                                                                                                                                                                                                                                                                                                                                                                                                                                                                                                                                                                                                                                                                                                                                                                                                                                                                                                                                                                                                                                                                                                                                                                                                                                                                                                                                                                                                                                                                                                                                                                                                                                                                                                                                                                                                                                                                                                                                                                                                                                                                                                                                                                                                                                                                                                                                                                                                                                                                                                                                                                                                                                                                                                                                                                                                                                                                                                                                                                                                                                                                                                                                                                                                                                                                                                                                                                                                                                                                                                                                                                                                                                                                                                                                                                                                                                                                                                                                                                                                                                                                                                                                                                                                                                                                                                                                                                                                                                                                                                                                                                                                                                                                                                                                                                                                                                                                                                                                                                                                                                                                                                                                                                                   | 10          | 0         | 0           | 0         | 0           | 0         |  |
|            | AAG   | 64                                                                                                                                                                                                                                                                                                                                                                                                                                                                                                                                                                                                                                                                                                                                                                                                                                                                                                                                                                                                                                                                                                                                                                                                                                                                                                                                                                                                                                                                                                                                                                                                                                                                                                                                                                                                                                                                                                                                                                                                                                                                                                                                                                                                                                                                                                                                                                                                                                                                                                                                                                                                                                                                                                                                                                                                                                                                                                                                                                                                                                                                                                                                                                                                                                                                                                                                                                                                                                                                                                                                                                                                                                                                                                                                                                                                                                                                                                                                                                                                                                                                                                                                                                                                                                                                                                                                                                                                                                                                                                                                                                                                                                                                                                                                                                                                                                                                                                                                                                                                                                                                                                                                                                                                                                                                                                                                                                                                                                                                                                                                                                                                                                                                                                                                                                                                                                   | 90          | 100       | 100         | 100       | 100         | 100       |  |
| Met        | ATG   | 100                                                                                                                                                                                                                                                                                                                                                                                                                                                                                                                                                                                                                                                                                                                                                                                                                                                                                                                                                                                                                                                                                                                                                                                                                                                                                                                                                                                                                                                                                                                                                                                                                                                                                                                                                                                                                                                                                                                                                                                                                                                                                                                                                                                                                                                                                                                                                                                                                                                                                                                                                                                                                                                                                                                                                                                                                                                                                                                                                                                                                                                                                                                                                                                                                                                                                                                                                                                                                                                                                                                                                                                                                                                                                                                                                                                                                                                                                                                                                                                                                                                                                                                                                                                                                                                                                                                                                                                                                                                                                                                                                                                                                                                                                                                                                                                                                                                                                                                                                                                                                                                                                                                                                                                                                                                                                                                                                                                                                                                                                                                                                                                                                                                                                                                                                                                                                                  | 100         | 100       | 100         | 100       | 100         | 100       |  |
| Phe        | TTT   | 38                                                                                                                                                                                                                                                                                                                                                                                                                                                                                                                                                                                                                                                                                                                                                                                                                                                                                                                                                                                                                                                                                                                                                                                                                                                                                                                                                                                                                                                                                                                                                                                                                                                                                                                                                                                                                                                                                                                                                                                                                                                                                                                                                                                                                                                                                                                                                                                                                                                                                                                                                                                                                                                                                                                                                                                                                                                                                                                                                                                                                                                                                                                                                                                                                                                                                                                                                                                                                                                                                                                                                                                                                                                                                                                                                                                                                                                                                                                                                                                                                                                                                                                                                                                                                                                                                                                                                                                                                                                                                                                                                                                                                                                                                                                                                                                                                                                                                                                                                                                                                                                                                                                                                                                                                                                                                                                                                                                                                                                                                                                                                                                                                                                                                                                                                                                                                                   | 0           | 0         | 0           | 0         | 0           | 0         |  |
|            | TTC   | 62                                                                                                                                                                                                                                                                                                                                                                                                                                                                                                                                                                                                                                                                                                                                                                                                                                                                                                                                                                                                                                                                                                                                                                                                                                                                                                                                                                                                                                                                                                                                                                                                                                                                                                                                                                                                                                                                                                                                                                                                                                                                                                                                                                                                                                                                                                                                                                                                                                                                                                                                                                                                                                                                                                                                                                                                                                                                                                                                                                                                                                                                                                                                                                                                                                                                                                                                                                                                                                                                                                                                                                                                                                                                                                                                                                                                                                                                                                                                                                                                                                                                                                                                                                                                                                                                                                                                                                                                                                                                                                                                                                                                                                                                                                                                                                                                                                                                                                                                                                                                                                                                                                                                                                                                                                                                                                                                                                                                                                                                                                                                                                                                                                                                                                                                                                                                                                   | 100         | 100       | 100         | 100       | 0           | 0         |  |
| Pro        | CCT   | 27                                                                                                                                                                                                                                                                                                                                                                                                                                                                                                                                                                                                                                                                                                                                                                                                                                                                                                                                                                                                                                                                                                                                                                                                                                                                                                                                                                                                                                                                                                                                                                                                                                                                                                                                                                                                                                                                                                                                                                                                                                                                                                                                                                                                                                                                                                                                                                                                                                                                                                                                                                                                                                                                                                                                                                                                                                                                                                                                                                                                                                                                                                                                                                                                                                                                                                                                                                                                                                                                                                                                                                                                                                                                                                                                                                                                                                                                                                                                                                                                                                                                                                                                                                                                                                                                                                                                                                                                                                                                                                                                                                                                                                                                                                                                                                                                                                                                                                                                                                                                                                                                                                                                                                                                                                                                                                                                                                                                                                                                                                                                                                                                                                                                                                                                                                                                                                   | 0           | 100       | 0           | 100       | 0           | 100       |  |
|            | CCC   | 28                                                                                                                                                                                                                                                                                                                                                                                                                                                                                                                                                                                                                                                                                                                                                                                                                                                                                                                                                                                                                                                                                                                                                                                                                                                                                                                                                                                                                                                                                                                                                                                                                                                                                                                                                                                                                                                                                                                                                                                                                                                                                                                                                                                                                                                                                                                                                                                                                                                                                                                                                                                                                                                                                                                                                                                                                                                                                                                                                                                                                                                                                                                                                                                                                                                                                                                                                                                                                                                                                                                                                                                                                                                                                                                                                                                                                                                                                                                                                                                                                                                                                                                                                                                                                                                                                                                                                                                                                                                                                                                                                                                                                                                                                                                                                                                                                                                                                                                                                                                                                                                                                                                                                                                                                                                                                                                                                                                                                                                                                                                                                                                                                                                                                                                                                                                                                                   | 79          | 0         | 62          | 0         | 22          | 0         |  |
|            | CCA   | 26                                                                                                                                                                                                                                                                                                                                                                                                                                                                                                                                                                                                                                                                                                                                                                                                                                                                                                                                                                                                                                                                                                                                                                                                                                                                                                                                                                                                                                                                                                                                                                                                                                                                                                                                                                                                                                                                                                                                                                                                                                                                                                                                                                                                                                                                                                                                                                                                                                                                                                                                                                                                                                                                                                                                                                                                                                                                                                                                                                                                                                                                                                                                                                                                                                                                                                                                                                                                                                                                                                                                                                                                                                                                                                                                                                                                                                                                                                                                                                                                                                                                                                                                                                                                                                                                                                                                                                                                                                                                                                                                                                                                                                                                                                                                                                                                                                                                                                                                                                                                                                                                                                                                                                                                                                                                                                                                                                                                                                                                                                                                                                                                                                                                                                                                                                                                                                   | 0           | 0         | 0           | 0         | 0           | 0         |  |
|            | CCG   | 22                                                                                                                                                                                                                                                                                                                                                                                                                                                                                                                                                                                                                                                                                                                                                                                                                                                                                                                                                                                                                                                                                                                                                                                                                                                                                                                                                                                                                                                                                                                                                                                                                                                                                                                                                                                                                                                                                                                                                                                                                                                                                                                                                                                                                                                                                                                                                                                                                                                                                                                                                                                                                                                                                                                                                                                                                                                                                                                                                                                                                                                                                                                                                                                                                                                                                                                                                                                                                                                                                                                                                                                                                                                                                                                                                                                                                                                                                                                                                                                                                                                                                                                                                                                                                                                                                                                                                                                                                                                                                                                                                                                                                                                                                                                                                                                                                                                                                                                                                                                                                                                                                                                                                                                                                                                                                                                                                                                                                                                                                                                                                                                                                                                                                                                                                                                                                                   | 21          | 0         | 38          | 0         | 78          | 0         |  |
| Ser        | AGT   | 13                                                                                                                                                                                                                                                                                                                                                                                                                                                                                                                                                                                                                                                                                                                                                                                                                                                                                                                                                                                                                                                                                                                                                                                                                                                                                                                                                                                                                                                                                                                                                                                                                                                                                                                                                                                                                                                                                                                                                                                                                                                                                                                                                                                                                                                                                                                                                                                                                                                                                                                                                                                                                                                                                                                                                                                                                                                                                                                                                                                                                                                                                                                                                                                                                                                                                                                                                                                                                                                                                                                                                                                                                                                                                                                                                                                                                                                                                                                                                                                                                                                                                                                                                                                                                                                                                                                                                                                                                                                                                                                                                                                                                                                                                                                                                                                                                                                                                                                                                                                                                                                                                                                                                                                                                                                                                                                                                                                                                                                                                                                                                                                                                                                                                                                                                                                                                                   | 0           | 0         | 0           | 0         | 0           | 0         |  |
|            | AGC   | 18                                                                                                                                                                                                                                                                                                                                                                                                                                                                                                                                                                                                                                                                                                                                                                                                                                                                                                                                                                                                                                                                                                                                                                                                                                                                                                                                                                                                                                                                                                                                                                                                                                                                                                                                                                                                                                                                                                                                                                                                                                                                                                                                                                                                                                                                                                                                                                                                                                                                                                                                                                                                                                                                                                                                                                                                                                                                                                                                                                                                                                                                                                                                                                                                                                                                                                                                                                                                                                                                                                                                                                                                                                                                                                                                                                                                                                                                                                                                                                                                                                                                                                                                                                                                                                                                                                                                                                                                                                                                                                                                                                                                                                                                                                                                                                                                                                                                                                                                                                                                                                                                                                                                                                                                                                                                                                                                                                                                                                                                                                                                                                                                                                                                                                                                                                                                                                   | 10          | 0         | 9           | 0         | 0           | 0         |  |
|            | TCT   | 18                                                                                                                                                                                                                                                                                                                                                                                                                                                                                                                                                                                                                                                                                                                                                                                                                                                                                                                                                                                                                                                                                                                                                                                                                                                                                                                                                                                                                                                                                                                                                                                                                                                                                                                                                                                                                                                                                                                                                                                                                                                                                                                                                                                                                                                                                                                                                                                                                                                                                                                                                                                                                                                                                                                                                                                                                                                                                                                                                                                                                                                                                                                                                                                                                                                                                                                                                                                                                                                                                                                                                                                                                                                                                                                                                                                                                                                                                                                                                                                                                                                                                                                                                                                                                                                                                                                                                                                                                                                                                                                                                                                                                                                                                                                                                                                                                                                                                                                                                                                                                                                                                                                                                                                                                                                                                                                                                                                                                                                                                                                                                                                                                                                                                                                                                                                                                                   | 0           | 0         | 0           | 0         | 0           | 0         |  |
|            | TCC   | 20                                                                                                                                                                                                                                                                                                                                                                                                                                                                                                                                                                                                                                                                                                                                                                                                                                                                                                                                                                                                                                                                                                                                                                                                                                                                                                                                                                                                                                                                                                                                                                                                                                                                                                                                                                                                                                                                                                                                                                                                                                                                                                                                                                                                                                                                                                                                                                                                                                                                                                                                                                                                                                                                                                                                                                                                                                                                                                                                                                                                                                                                                                                                                                                                                                                                                                                                                                                                                                                                                                                                                                                                                                                                                                                                                                                                                                                                                                                                                                                                                                                                                                                                                                                                                                                                                                                                                                                                                                                                                                                                                                                                                                                                                                                                                                                                                                                                                                                                                                                                                                                                                                                                                                                                                                                                                                                                                                                                                                                                                                                                                                                                                                                                                                                                                                                                                                   | 72          | 100       | 77          | 100       | 67          | 100       |  |
| Thr        | TCA   | 14                                                                                                                                                                                                                                                                                                                                                                                                                                                                                                                                                                                                                                                                                                                                                                                                                                                                                                                                                                                                                                                                                                                                                                                                                                                                                                                                                                                                                                                                                                                                                                                                                                                                                                                                                                                                                                                                                                                                                                                                                                                                                                                                                                                                                                                                                                                                                                                                                                                                                                                                                                                                                                                                                                                                                                                                                                                                                                                                                                                                                                                                                                                                                                                                                                                                                                                                                                                                                                                                                                                                                                                                                                                                                                                                                                                                                                                                                                                                                                                                                                                                                                                                                                                                                                                                                                                                                                                                                                                                                                                                                                                                                                                                                                                                                                                                                                                                                                                                                                                                                                                                                                                                                                                                                                                                                                                                                                                                                                                                                                                                                                                                                                                                                                                                                                                                                                   | 3           | 0         | 0           | 0         | 0           | 0         |  |
|            | TCG   | 16                                                                                                                                                                                                                                                                                                                                                                                                                                                                                                                                                                                                                                                                                                                                                                                                                                                                                                                                                                                                                                                                                                                                                                                                                                                                                                                                                                                                                                                                                                                                                                                                                                                                                                                                                                                                                                                                                                                                                                                                                                                                                                                                                                                                                                                                                                                                                                                                                                                                                                                                                                                                                                                                                                                                                                                                                                                                                                                                                                                                                                                                                                                                                                                                                                                                                                                                                                                                                                                                                                                                                                                                                                                                                                                                                                                                                                                                                                                                                                                                                                                                                                                                                                                                                                                                                                                                                                                                                                                                                                                                                                                                                                                                                                                                                                                                                                                                                                                                                                                                                                                                                                                                                                                                                                                                                                                                                                                                                                                                                                                                                                                                                                                                                                                                                                                                                                   | 14          | 0         | 14          | 0         | 33          | 0         |  |
|            | ACT   | 24                                                                                                                                                                                                                                                                                                                                                                                                                                                                                                                                                                                                                                                                                                                                                                                                                                                                                                                                                                                                                                                                                                                                                                                                                                                                                                                                                                                                                                                                                                                                                                                                                                                                                                                                                                                                                                                                                                                                                                                                                                                                                                                                                                                                                                                                                                                                                                                                                                                                                                                                                                                                                                                                                                                                                                                                                                                                                                                                                                                                                                                                                                                                                                                                                                                                                                                                                                                                                                                                                                                                                                                                                                                                                                                                                                                                                                                                                                                                                                                                                                                                                                                                                                                                                                                                                                                                                                                                                                                                                                                                                                                                                                                                                                                                                                                                                                                                                                                                                                                                                                                                                                                                                                                                                                                                                                                                                                                                                                                                                                                                                                                                                                                                                                                                                                                                                                   | 0           | 0         | 3           | 0         | 0           | 0         |  |
|            | ACC   | 32                                                                                                                                                                                                                                                                                                                                                                                                                                                                                                                                                                                                                                                                                                                                                                                                                                                                                                                                                                                                                                                                                                                                                                                                                                                                                                                                                                                                                                                                                                                                                                                                                                                                                                                                                                                                                                                                                                                                                                                                                                                                                                                                                                                                                                                                                                                                                                                                                                                                                                                                                                                                                                                                                                                                                                                                                                                                                                                                                                                                                                                                                                                                                                                                                                                                                                                                                                                                                                                                                                                                                                                                                                                                                                                                                                                                                                                                                                                                                                                                                                                                                                                                                                                                                                                                                                                                                                                                                                                                                                                                                                                                                                                                                                                                                                                                                                                                                                                                                                                                                                                                                                                                                                                                                                                                                                                                                                                                                                                                                                                                                                                                                                                                                                                                                                                                                                   | 75          | 100       | 62          | 100       | 70          | 100       |  |
| Trp        | ACA   | 24                                                                                                                                                                                                                                                                                                                                                                                                                                                                                                                                                                                                                                                                                                                                                                                                                                                                                                                                                                                                                                                                                                                                                                                                                                                                                                                                                                                                                                                                                                                                                                                                                                                                                                                                                                                                                                                                                                                                                                                                                                                                                                                                                                                                                                                                                                                                                                                                                                                                                                                                                                                                                                                                                                                                                                                                                                                                                                                                                                                                                                                                                                                                                                                                                                                                                                                                                                                                                                                                                                                                                                                                                                                                                                                                                                                                                                                                                                                                                                                                                                                                                                                                                                                                                                                                                                                                                                                                                                                                                                                                                                                                                                                                                                                                                                                                                                                                                                                                                                                                                                                                                                                                                                                                                                                                                                                                                                                                                                                                                                                                                                                                                                                                                                                                                                                                                                   | 0           | 0         | 0           | 0         | 0           | 0         |  |
|            | ACG   | 20                                                                                                                                                                                                                                                                                                                                                                                                                                                                                                                                                                                                                                                                                                                                                                                                                                                                                                                                                                                                                                                                                                                                                                                                                                                                                                                                                                                                                                                                                                                                                                                                                                                                                                                                                                                                                                                                                                                                                                                                                                                                                                                                                                                                                                                                                                                                                                                                                                                                                                                                                                                                                                                                                                                                                                                                                                                                                                                                                                                                                                                                                                                                                                                                                                                                                                                                                                                                                                                                                                                                                                                                                                                                                                                                                                                                                                                                                                                                                                                                                                                                                                                                                                                                                                                                                                                                                                                                                                                                                                                                                                                                                                                                                                                                                                                                                                                                                                                                                                                                                                                                                                                                                                                                                                                                                                                                                                                                                                                                                                                                                                                                                                                                                                                                                                                                                                   | 25          | 0         | 35          | 0         | 30          | 0         |  |
|            | TGG   | 100                                                                                                                                                                                                                                                                                                                                                                                                                                                                                                                                                                                                                                                                                                                                                                                                                                                                                                                                                                                                                                                                                                                                                                                                                                                                                                                                                                                                                                                                                                                                                                                                                                                                                                                                                                                                                                                                                                                                                                                                                                                                                                                                                                                                                                                                                                                                                                                                                                                                                                                                                                                                                                                                                                                                                                                                                                                                                                                                                                                                                                                                                                                                                                                                                                                                                                                                                                                                                                                                                                                                                                                                                                                                                                                                                                                                                                                                                                                                                                                                                                                                                                                                                                                                                                                                                                                                                                                                                                                                                                                                                                                                                                                                                                                                                                                                                                                                                                                                                                                                                                                                                                                                                                                                                                                                                                                                                                                                                                                                                                                                                                                                                                                                                                                                                                                                                                  | 100         | 100       | 100         | 100       | 100         | 100       |  |
| Tyr        | TAT   | 47                                                                                                                                                                                                                                                                                                                                                                                                                                                                                                                                                                                                                                                                                                                                                                                                                                                                                                                                                                                                                                                                                                                                                                                                                                                                                                                                                                                                                                                                                                                                                                                                                                                                                                                                                                                                                                                                                                                                                                                                                                                                                                                                                                                                                                                                                                                                                                                                                                                                                                                                                                                                                                                                                                                                                                                                                                                                                                                                                                                                                                                                                                                                                                                                                                                                                                                                                                                                                                                                                                                                                                                                                                                                                                                                                                                                                                                                                                                                                                                                                                                                                                                                                                                                                                                                                                                                                                                                                                                                                                                                                                                                                                                                                                                                                                                                                                                                                                                                                                                                                                                                                                                                                                                                                                                                                                                                                                                                                                                                                                                                                                                                                                                                                                                                                                                                                                   | 13          | 0         | 0           | 0         | 0           | 0         |  |
|            | TAC   | 53                                                                                                                                                                                                                                                                                                                                                                                                                                                                                                                                                                                                                                                                                                                                                                                                                                                                                                                                                                                                                                                                                                                                                                                                                                                                                                                                                                                                                                                                                                                                                                                                                                                                                                                                                                                                                                                                                                                                                                                                                                                                                                                                                                                                                                                                                                                                                                                                                                                                                                                                                                                                                                                                                                                                                                                                                                                                                                                                                                                                                                                                                                                                                                                                                                                                                                                                                                                                                                                                                                                                                                                                                                                                                                                                                                                                                                                                                                                                                                                                                                                                                                                                                                                                                                                                                                                                                                                                                                                                                                                                                                                                                                                                                                                                                                                                                                                                                                                                                                                                                                                                                                                                                                                                                                                                                                                                                                                                                                                                                                                                                                                                                                                                                                                                                                                                                                   | 88          | 100       | 100         | 100       | 100         | 100       |  |
| Val        | GTT   | 27                                                                                                                                                                                                                                                                                                                                                                                                                                                                                                                                                                                                                                                                                                                                                                                                                                                                                                                                                                                                                                                                                                                                                                                                                                                                                                                                                                                                                                                                                                                                                                                                                                                                                                                                                                                                                                                                                                                                                                                                                                                                                                                                                                                                                                                                                                                                                                                                                                                                                                                                                                                                                                                                                                                                                                                                                                                                                                                                                                                                                                                                                                                                                                                                                                                                                                                                                                                                                                                                                                                                                                                                                                                                                                                                                                                                                                                                                                                                                                                                                                                                                                                                                                                                                                                                                                                                                                                                                                                                                                                                                                                                                                                                                                                                                                                                                                                                                                                                                                                                                                                                                                                                                                                                                                                                                                                                                                                                                                                                                                                                                                                                                                                                                                                                                                                                                                   | 0           | 0         | 0           | 0         | 0           | 0         |  |
|            | GTC   | 33                                                                                                                                                                                                                                                                                                                                                                                                                                                                                                                                                                                                                                                                                                                                                                                                                                                                                                                                                                                                                                                                                                                                                                                                                                                                                                                                                                                                                                                                                                                                                                                                                                                                                                                                                                                                                                                                                                                                                                                                                                                                                                                                                                                                                                                                                                                                                                                                                                                                                                                                                                                                                                                                                                                                                                                                                                                                                                                                                                                                                                                                                                                                                                                                                                                                                                                                                                                                                                                                                                                                                                                                                                                                                                                                                                                                                                                                                                                                                                                                                                                                                                                                                                                                                                                                                                                                                                                                                                                                                                                                                                                                                                                                                                                                                                                                                                                                                                                                                                                                                                                                                                                                                                                                                                                                                                                                                                                                                                                                                                                                                                                                                                                                                                                                                                                                                                   | 81          | 100       | 72          | 100       | 50          | 100       |  |
|            | GTA   | 13                                                                                                                                                                                                                                                                                                                                                                                                                                                                                                                                                                                                                                                                                                                                                                                                                                                                                                                                                                                                                                                                                                                                                                                                                                                                                                                                                                                                                                                                                                                                                                                                                                                                                                                                                                                                                                                                                                                                                                                                                                                                                                                                                                                                                                                                                                                                                                                                                                                                                                                                                                                                                                                                                                                                                                                                                                                                                                                                                                                                                                                                                                                                                                                                                                                                                                                                                                                                                                                                                                                                                                                                                                                                                                                                                                                                                                                                                                                                                                                                                                                                                                                                                                                                                                                                                                                                                                                                                                                                                                                                                                                                                                                                                                                                                                                                                                                                                                                                                                                                                                                                                                                                                                                                                                                                                                                                                                                                                                                                                                                                                                                                                                                                                                                                                                                                                                   | 2           | 0         | 0           | 0         | 0           | 0         |  |
|            | GTG   | 27                                                                                                                                                                                                                                                                                                                                                                                                                                                                                                                                                                                                                                                                                                                                                                                                                                                                                                                                                                                                                                                                                                                                                                                                                                                                                                                                                                                                                                                                                                                                                                                                                                                                                                                                                                                                                                                                                                                                                                                                                                                                                                                                                                                                                                                                                                                                                                                                                                                                                                                                                                                                                                                                                                                                                                                                                                                                                                                                                                                                                                                                                                                                                                                                                                                                                                                                                                                                                                                                                                                                                                                                                                                                                                                                                                                                                                                                                                                                                                                                                                                                                                                                                                                                                                                                                                                                                                                                                                                                                                                                                                                                                                                                                                                                                                                                                                                                                                                                                                                                                                                                                                                                                                                                                                                                                                                                                                                                                                                                                                                                                                                                                                                                                                                                                                                                                                   | 17          | 0         | 26          | 0         | 50          | 0         |  |
|            |       | <div><div></div><div></div><div></div><div></div><div></div><div></div><div></div><div></div><div></div><div></div><div></div><div></div><div></div><div></div><div></div><div></div><div></div><div></div><div></div><div></div><div></div><div></div><div></div><div></div><div></div><div></div><div></div><div></div><div></div><div></div><div></div><div></div><div></div><div></div><div></div><div></div><div></div><div></div><div></div><div></div><div></div><div></div><div></div><div></div><div></div><div></div><div></div><div></div><div></div><div></div><div></div><div></div><div></div><div></div><div></div><div></div><div></div><div></div><div></div><div></div><div></div><div></div><div></div><div></div><div></div><div></div><div></div><div></div><div></div><div></div><div></div><div></div><div></div><div></div><div></div><div></div><div></div><div></div><div></div><div></div><div></div><div></div><div></div><div></div><div></div><div></div><div></div><div></div><div></div><div></div><div></div><div></div><div></div><div></div><div></div><div></div><div></div><div></div><div></div><div></div><div></div><div></div><div></div><div></div><div></div><div></div><div></div><div></div><div></div><div></div><div></div><div></div><div></div><div></div><div></div><div></div><div></div><div></div><div></div><div></div><div></div><div></div><div></div><div></div><div></div><div></div><div></div><div></div><div></div><div></div><div></div><div></div><div></div><div></div><div></div><div></div><div></div><div></div><div></div><div></div><div></div><div></div><div></div><div></div><div></div><div></div><div></div><div></div><div></div><div></div><div></div><div></div><div></div><div></div><div></div><div></div><div></div><div></div><div></div><div></div><div></div><div></div><div></div><div></div><div></div><div></div><div></div><div></div><div></div><div></div><div></div><div></div><div></div><div></div><div></div><div></div><div></div><div></div><div></div><div></div><div></div><div></div><div></div><div></div><div></div><div></div><div></div><div></div><div></div><div></div><div></div><div></div><div></div><div></div><div></div><div></div><div></div><div></div><div></div><div></div><div></div><div></div><div></div><div></div><div></div><div></div><div></div><div></div><div></div><div></div><div></div><div></div><div></div><div></div><div></div><div></div><div></div><div></div><div></div><div></div><div></div><div></div><div></div><div></div><div></div><div></div><div></div><div></div><div></div><div></div><div></div><div></div><div></div><div></div><div></div><div></div><div></div><div></div><div></div><div></div><div></div><div></div><div></div><div></div><div></div><div></div><div></div><div></div><div></div><div></div><div></div><div></div><div></div><div></div><div></div><div></div><div></div><div></div><div></div><div></div><div></div><div></div><div></div><div></div><div></div><div></div><div></div><div></div><div></div><div></div><div></div><div></div><div></div><div></div><div></div><div></div><div></div><div></div><div></div><div></div><div></div><div></div><div></div><div></div><div></div><div></div><div></div><div></div><div></div><div></div><div></div><div></div><div></div><div></div><div></div><div></div><div></div><div></div><div></div><div></div><div></div><div></div><div></div><div></div><div></div><div></div><div></div><div></div><div></div><div></div><div></div><div></div><div></div><div></div><div></div><div></div><div></div><div></div><div></div><div></div><div></div><div></div><div></div><div></div><div></div><div></div><div></div><div></div><div></div><div></div><div></div><div></div><div></div><div></div><div></div><div></div><div></div><div></div><div></div><div></div><div></div><div></div><div></div><div></div><div></div><div></div><div></div><div></div><div></div><div></div><div></div><div></div><div></div><div></div><div></div><div></div><div></div><div></div><div></div><div></div><div></div><div></div><div></div><div></div><div></div><div></div><div></div><div></div><div></div><div></div><div></div><div></div><div></div><div></div><div></div><div></div><div></div><div></div><div></div><div></div><div></div><div></div><div></div><div></div><div></div><div></div><div></div><div></div><div></div><div></div><div></div><div></div><div></div><div></div><div></div><div></div><div></div><div></div><div></div><div></div><div></div><div></div><div></div><div></div><div></div><div></div><div></div><div></div><div></div><div></div><div></div><div></div><div></div><div></div><div></div><div></div><div></div><div></div><div></div><div></div><div></div><div></div><div></div><div></div><div></div><div></div><div></div><div></div><div></div><div></div><div></div><div></div><div></div><div></div><div></div><div></div><div></div><div></div><div></div><div></div><div></div><div></div><div></div><div></div><div></div><div></div><div></div><div></div><div></div><div></div><div></div><div></div><div></div><div></div><div></div><div></div><div></div><div></div><div></div><div></div><div></div><div></div><div></div><div></div><div></div><div></div><div></div><div></div><div></div><div></div><div></div><div></div><div></div><div></div><div></div><div></div><div></div><div></div><div></div><div></div><div></div><div></div><div></div><div></div><div></div><div></div><div></div><div></div><div></div><div></div><div></div><div></div><div></div><div></div><div></div><div></div><div></div><div></div><div></div><div></div><div></div><div></div><div></div><div></div><div></div><div></div><div></div><div>&lt;/</div></div> |             |           |             |           |             |           |  |

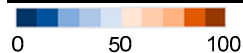

### 3. Sequences of DEBS1-TE and PCC

#### Codon-optimized DEBS1-TE:

ATGGCCGATCTCTCCAAGCTCTCCGATTCCCGCACCGCCAGCCTGGCCGCATCGTCCGCCCTTGGCCTCTCTCCGGCTGCAA  
CGAGTCCGCCCTCCGCGCCCGCGCCCGCCAGCTCCGCGCCCATCTCGATCGCTTCCCTGATGCCGGCGTCGAGGGCGTCGG  
CGCCGCCCTCGCCCATGATGAGCAGGCCGATGCCGGCCCTCATCGCGCCGTCGTCTCGCCTCCCTCCACCTCCGAGCTCCTC  
GATGGCCTCGCCGCCGTCGCCGATGGCCGCCCTCATGCCTCCGTCTCGCGCGCGTCGCCCGCCCTTCCGCCCTGTCTGTC  
TTCTCTTCCCTGGCCAGGGCGCCAGTGGGCCGGCATGGCCGGCGAGCTCCTCGCGCAGTCCCGCGCTTCTCGCCGCCGCC  
ATGGATGCCTGCGCCCGCGCCTTCGAGCCTGTACCCGATTGGACCCTCGCCAGGTCTCTGATTCCCTGAGCAGTCCCGCC  
CGCTCGAGGTCTCCAGCCTGCCCTTCTCGCCCTCCAGACCTCCTCGCCGCCCTCTGGCGCTCCTTCCGGCGTCAACCTGA  
TGCCGTCTCGCGCCATTCCATCGGCGAGCTCGCCGCCGCCCATGTCTCGGGCGCCGCCGGCGCCGCCGATGCCGCCGCCGCG  
CGCCGCCCTCTGGTCCCGCGAGATGATCCCTCTCGTCCGCAACGGCGATATGGCCGCCGTCGCCCTCTCCGCCGATGAGATC  
GAGCCTCGCATCGCCCGTGGGATGATGTCGTCTCGCCGGCGTCAACGGCCCTCGCTCCGTCTCTACCCGGCTCCC  
CGAGCTGTCCGCCCGCCGCTCCAGGAGCTCCGCCGAGGGCGTCCGCCGCCAGGTATCAACGTCTCCATGGCCGCC  
ATTCCGCCAGGTCTGATGATATCGCCGAGGGCATGCGCTCCGCCCTCGCTGGTTCCGCCCTGGCGGCTCCGAGGTCCCTTT  
CTACGCCCTCCCTACCCGGCGGCCGCTCGATACCCGCGAGCTCGTCCGCCATTACTGGCGCCGCTCCTTCCGCCCTCCCTGTC  
CGCTTCAGGAGTACCGCTCCGCCCTCGAGTTCGAGCTCGCCCTGGCACCTTCGTGAGGCCCTCCCTACCTGCTCCGCC  
CCGCCCTCCAGCAGACCTCGATGCCGAGGGCTCTCCGCCGCCGCTCGCTACCTCCAGCGCGGCCGCGGCCGATGCG  
GCCGCTTCTCTCGCCGCCGCCAGGCCCTTACCCGGCGGCCGTCGCCGTGATTGGACCGCCGCTACGATGATGTCGGCG  
CCGAGCCTGGCTCCCTCCCTGAGTTCCGCCCTGCCGAGGAGGAGGATGAGCCTGCCGAGTCCGGCGTCGATTGGAACGCC  
CTCTCATGTCTCCGAGCGCCTCTCGCCGTCTCAACGGCGAGACCGCCGCCCTCGCCGCCCGCGAGGCGGATGCCG  
AGGCCACCTTCCGCGAGCTCGGCCCTCGATTCCGTCTCGCCCTCGAGCTCCGCGCCAAGGTCTCCGCCGCCATCGGCCGCG  
AGGTCAACATCGCCCTCCTTACGATCATCTACCCCTCGCGCCCTCGCCGAGGCCCTCGCCGCCGGCACCGAGGTGCCCCA  
GCGCGAGACCGCGCCCGCACCAACGAGGCCGCCCTGGCGAGCCTGTGCGCGTCTCGCCATGGCCTGCCGCCCTCCCTGG  
CGCGCTTCCACCCCTGAGGAGTTCTGGGAGCTCCTCTCCGAGGGCGCGATGCCGTCTCGCCGCCCTCCCTACCGATCGCG  
CTGGGATCTCGATTCCCTTCTCCATCTGATCTACCCGCTCCGGCACCGCCCATCAGCGCGCGCGCGCTTCTCACCAG  
GCCACGCCCTTCGATCTGCTTCTTCCGATGTCCCTCGCGAGGCCCTCGCCGTGATCCTCAGCAGCGCCTCATGCTCGA  
GCTCTCTGGGAGGTCTCGAGCGCGCGGCATCCCTCCTACCTCCCTCCAGGCCCTCCCTACCGGGCTTCTCGTCCGCCCTC  
ATCCCTCAGGAGTACCGCCCTCGCCTCGCCGAGGGCGCGCGAGGGCGTCGAGGGCTACCTCATGACCGGCACCAACACCTCC  
GTCGCTCCGCCCGCATCGCCTACACCTCGGCCCTCGAGGGCCCTGCCATCTCGTCTGATACCGCCTGCTCCTCCTCCCTCG  
TCGCCGTCCATCTCGCCTGCCAGTCCCTCCGCCCGCGCGAGTCCCTCCCTCGCCATGGCCGGCGCGCTCACCGTCATGCTAC  
CCCTGGCATGCTCGTCGATTTCTCCCGCATGAACCTCCCTCGCCCTGATGGCCGTGCAAGGCCCTTCTCCGCCGGCGCCAAAC  
GGCTTGGCATGGCCGAGGGCGCGGCATGCTCTCGCTCGAGCGCCTCTCCGATGCCCGCCGCAACGGCCATCTGTCTCTC  
GCCGTCTCCGCGCACCGCCGTCAACTCCGATGGCGCCTCAACGGCCCTCTCCGCCCTAACGGCCGCGCCAGGTCCGC  
GTATCCAGCAGGCCCTCGCCGAGTCCGGCCTCGGCCCTGCCGATATCGATGCCGTGAGGCCATGGCACCGGCACCCGCG  
CTCGGCGATCCTATCGAGGCCCGCGCCCTTTCGAGGCCCTACGGCCGCGATCGCGAGCAGCCTCTCCATCTCGGCTCCGTCA  
AGCGAGGCCCTCGCGCCACAGGCCCGCCGCTCGCCGCCCATCAAGATGGTCTCGCCAGGATCTCGCCGATATCTGCTCGCC  
TCCCTCGCACCTCCATGCTCCGAGCGCTCAAGGAGATCGATTGGTCTCCGGCGCCATCTCCCTCCTCGATGAGCCTGAG  
CCTTGGCCTGCCGGCGCCCGCCCTCGCCGCGCGCGCTCTCCTCTCGGCATCTCCGGCACCAACGCCCATGCCATCATCG  
AGGAGGCCCTCAGGTCTCGAGGGCGAGCGCGTCTGAGGCCGGCGATGTCGTGCCCCCTGGGTCTCTCCGCCCTCTCCG  
ACTCCTCGCCACCGGCCGCGCCGCCCTCCTCATCGCGCGCCTTCCGCCCTGTGATGAGTCCGCCGCCCTCCGCGTCTCT  
CGATGGCCTCGCCACCGGCAACGCCGATGGCGCGCGCGTCCGCCACCTCCCGCGCCAGCAGCGCGCCGTCTTCTGCTTCCC  
TGGCCAGGGCTGGCAGTGGCGCGCATGGCCGTGATCTCTCGATACCTCCCTGTCTTCCGCCCGCGCCCTCCGCGAGTGC  
CCGATGACCTCGAGCTCATCTCGATTTCGAGTTCATCCCTTCTCCGCCCGAGGCCGCCCGCGCGATGCGCGAGTCCG  
CCCTCTCCACCGAGCGCGTCTGATGTCGTCCAGCCTGTCTGTTCCGCGTATGGTCTCCCTCGCCTCCATGTGGCGCGCCAT  
GGCGTCGAGCCTGCCGCCGTATCGGCCATTCCAGGGCGAGATCGCCGCCGCCGTGCGTCCGCCGGCGCCCTCTCCCTCGAT  
GATGCCGCCCGCGTCTGCGCCTCCGCTCCCGCGTATCGCCACCATGCCGTGGCAACAAGGGCATGGCCTCCATCGCCGCC  
CTGCCGGCGAGGTCCGCGCCCGCATCGCGCATCGCGTCAAGTCCGCGCCGTCAACGGCCCTCGCTCCGTCTGTCGCGCG  
GCGATTCCGATGAGCTGATCGCCTCTGCGCCTCTGCACCACCGAGTGCATCCGCGCCAAGCGCCTCGCCGTGATTACGC  
CTCCCATTCCTCCCATGTGAGACCATCCGCGATGCCCTCCATGCCGAGCTCGGCGAGGATTTCATCCTCTCCCTGGCTTCG  
TCCCTTTCTTCTCCACCGTACCGGCCGCTGGACCCAGCCTGATGAGTCTGATGCCGGCTACTGGTACCGCAACCTCCGCCG  
ACCCTTCCGCTTCCCGGATGCCGTCCGCGCCCTCGCCGAGCAGGATCCGACCTTCTCGAGGTCTCCGCCCATCTCCTATCC  
TACCGCCGCCCATCGAGGATCGGCGATGGCTCCGGCGCGCATCTCTCGCCATCCATTCCCTCCGCCCGCGCGATGGCTC  
CCTCGCCGATTTCCGGCGAGGCCCTCTCCCGCGCCTTCCGCCCGCGCGTCCGCGTCTGATTGGGAGTCCGTCCATCTCGGCACC  
GGCGCCCGCGCGTCCCTCTCCCTACCTACCTTTCCAGCGCGAGCGCGTCTGGCTCGAGCCTAAGCCTGTGCGCCGCCGT  
CCACCGAGGTCTGATGAGGTCTCCGCCCTCCGCTACCGCATCGATGGCGCCCTACCGCGCGCGCGCGATGCCCTGCCCTCG  
ATGGCACCTGGCTCTGCGCAAGTACGCCGGCACCGCCGATGAGACCTCCACCGCCGCCGCGAGGCCCTCGAGTCCGCCG  
GCGCCCGCTCCGCGAGTCTGTCGTGATGCCCGTCCGCCCGCGATGAGTCTCGCCGAGCGCCTCCGCTCCGTCCGCGAG  
GTCGCCGCGTCTCTCCCTCTCGCGTCTGATGAGGCCGAGCCTGAGGAGGCCCTCTCGCCCTCGCCTCCCTCGCCGATA  
CCCTCTCCCTCTCGTAGGCCATGGTCTCCGCCGAGCTCGGCTGCCCTCTTGGACCGTCAACGAGTCCGCCGTGCGCACCGG  
CCCTTTCGAGCGCGTCCGCAACGCCGCCCATGGCGCCCTCTGGGGCGTCCGCCGCGTCTCGCCCTCGAGAACCCTGCCGT  
CTGGGGCGGCCCTCGTCTGATGTCCTGCCGGCTCCGTCCGCCGAGTCCGCCGCCATCTCGCCGCGCGTCTCTCCGGCGCGC  
CGCGAGGATCAGCTCGCCTCCGCGCGATGGCGTCTACGGCGCGCTGGGTCCGCGCGCGCCCGCCCTGCCACCGATGA  
TGAGTGGAAGCCTACCGGCACCGTCTCTGTCACCGGGCGGACCGGGCGCGTCCGGCGGCCAGATCGCCCGCTGGCTCGCCG  
CCGCGCGCGCCCTCATCTCTCTGTCCTCCGCTCCGGCCCTGATGCCGATGGCGCGCGCGAGTCTGTCGCCGAGCTCGA  
GGCCCTCGGCGCCCGCACACCGTCCGCCCTGCGATGTACCGATCGCGAGTCCGTCCGCGAGCTCCTCGGGCGCATCGG

CGATGATGTCCCTCTCTCCGCCGTCTTCCATGCCGCCGCCACCCTCGATGATGGCACCGTCGATACCCCTACCCGGCGAGCGC  
ATCGAGCGCGCCTCCCGCGCAAGGTCTCTGGCGGCCCGAACCTCCATGAGCTCACCCGCGAGCTCGATCTCACCGCCTTCG  
TCCTCTTCTCCTCCTTCGCCCTCCGCCCTTCGGCGCCCTGGCCTCGGCGGCTACGCCCTGGCAACGCCCTACCTCGATGGCCT  
CGCCAGCAGCGCCGCTCCGATGGCCTCCCTGCCACCGCCGTGCCTGGGGCACCTGGGCCGGCTCCGGCATGGCCGAGG  
GCCCTGTGCGCGATCGCTTCGCCGCCCATGGCGTCATCGAGATGCCCTCTGAGACCGCCTGCCGCGCCCTCCAGAACGCCCT  
CGATCGCGCGCGAGGTCTGCCCTATCGTCATCGATGTCCGCTGGGATCGCTTCCTCCTCGCCTACACCGCCAGCGCCCTACC  
CGCCTCTTCGATGAGATCGATGATGCCCGCGCGCCGCCCTCAGGCCGCCGCGAGCCTCGCGTCGGCGCCCTCGCCTCC  
CTCCTGCCCCCTGAGCGCGAGAAGGCCCTCTTCGAGCTCGTCCGCTCCCATGCCGCCGCCGTCTCGGCCATGCCCTCCGCCG  
AGCGCGTCCCTGCCGATCAGGCCTTCGCCGAGCTCGGCGTCGATTCCCTCTCCGCCCTCGAGCTCCGCAACGCCCTCGGCGC  
CGCCACCGCGCTCCGCCCTCCCTACCACCACCGTCTTCGATCATCCTGATGTCCGCACCCCTCGCCGCCCATCTCGCCGCCGAG  
CTCGGCGGCGCCACCGGCGCGGAGCAGGCCGCCCTGCCACCACCGCCCTGTGATGAGCCTATCGCCATCGTCGGCATG  
GCCTGCCGCCTCCCTGGCGAGGTGCGATTCCCTGAGCGCCTCTGGGAGCTCATCACCTCCGGCCGCGATTCCGCCGCCGAG  
GTCCCTGATGATCGCGCTGGGTCCCTGATGAGCTCATGGCCTCCGATGCCGCCGGCACCCGCCGCGCCCATGGCAACTTCA  
TGGCCGCGCGGCTCCGCCCTCCCTACCGCCTTCCTCGGCCTTCCTCGGCTCGCGAGGCCCTCGCCATCGAGGCCCATGGCA  
GGCCCTCGAGACCACCTGGGAGGCCCTCGAGTCCGCCGGCATCCCTCCTGAGACCCTCCGCGGCTCCGATACCGGCGTCTTC  
GTCCGATGTCCCATCAGGGCTACGCCACCGCCGCCCTCGCCCTGAGGATGGCGTCGATGGCTACCTCCTACCGGCAACA  
CCGCCCTCCGTGCGCTCCGCCGCATCGCCTACGTCTCGGCCTCGAGGGCCCTGCCCTACCGTCGATACCGCCTGCTCCTC  
CTCCGATGGCGCTCCCGCATGGTCCCTGAGCCTTCCTCGGCCTTCCTCGGCTCGCGAGGCCCTCGCCATCGAGGCCCATGGCA  
ATGGCCGCCCTGAGGTCTTACCAGATTCTCCCGCCAGGGCGCCCTCTCCCTGATGGCCGCTGCAAGCCTTTCTCCGATG  
AGGCCGATGGCTTCGGCCTCGGCGAGGGCTCCGCCCTTCGTGCTCCTCCAGCGCCTCTCCGATGCCCGCGCGAGGGCCGCC  
GCGTCTCGGCGTCGTCCGCCGTCCGCCGTCAACCAGGATGGCGCCTCCAACGGCCTCTCCGCCCTTCGGCGTCCGCC  
AGCAGCCGCGCTCCGCCGTCCGCCGTCCGCCGTCCGCCGTCCGCCGTCCGCCGTCCGCCGTCCGCCGTCCGCCGTCCGCCGTCCGCC  
GGCACCCGCTCGGCGATCCTGTGAGGGCTCCGCCCTCCTCGCCACCTACGGCAAGTCCCGCGGCTCCTCGGCCCTGTC  
CTCCTCGGCTCCGTCAAGTCCAACATCGGCCATGCCAGGCCGCCGCCGGCGTCCGCCGGCTCATCAAGTCTCCTCGGCC  
TCGAGCGCGGCTCGTCCCTCCTATGCTCTGCCGCGGCGAGCGCTCCGGCCTCATGATTGGTCTCCTCGGCGAGATCGAGCT  
CGCCGATGGCGTCCGCCGAGTGGTCCCTGCCGCCGATGGCTCCGCCGCGCGGCGTCTCCGCCCTCGGCGTCTCCGCCAC  
CAACGCCCATGTATCATCGCCGAGCCTCCTGAGCCTGAGCCTGTCCCTCAGCCTCGCCGCATGCTCCTGCCACCGGCGTC  
GTCCCTGTGCTCCTCTCCGCCCGCACCGGCCGCCGCCCTCCGCCGCCAGGCCGCCGCCCTCGCCGATCATCTCGCCGCCCAT  
CCTGGCATCGCCCTGCCGATGTCTCCTGACCATGGCCCGCGCCGCCAGCATTTTCGAGGAGCGCGCGCGCGTCTCCGCC  
GCCGATACCGCCGAGGCCGTCCATCGCCTCCGCCCGCTCGCCGATGGCGCCGTCTCCCTGGCGTCTGTCACCGGCTCCGCC  
TCCGATGGCGGCTCCGTCTTCGTCTTCCCTGGCCAGGGCGCCAGTGGGAGGGCATGGCCCGCGAGCTCCTCCTGTCCCTG  
TCTTCGCCGAGTCCATCGCCGAGTGGCATGCCGTCTCTCCGAGGTCCGCCGCTTCTCCGTCTCCGAGGTCTCGAGCCTCG  
CCCTGATGCCCTTCCTCGAGCGCTCGATGTCTCCAGCCTGTCTCTTCGCCGTCTGGTCTCCCTCGCCGCCCTTCGGC  
CGCCTCGCGCGCGCTCCCTTCGCCGTCTCCGCCGTATCGGCTATCCAGGGCGAGATCGCCGCCCGCTCGTCCGCCGCCCTCT  
CCCTCGAGGATGGCATGCGCGTCTGCGCCGCCGTCCCGCGCGTCCGCCGCCGTCCGCCGCCCGGCTCCATGCTCTCCG  
TCCGCCGCCGCCGTCCGATGTGAGAAGCTCCTCGCCGATGATTCTTGACCGGCCGCCCTCGAGGTCCGCCGCCGTCAACG  
GCCCTGATGCCGTCTGTCGCGCGGATGCCAGGCCGCCCGCGAGTTCCTCGAGTACTGCGAGGGCGTCCGCATCCGCG  
CCCGGCCATCCCTGTGATTACGCCCTCCCATACCGCCCATGTCCGAGCCTGTCCGCCGATGAGCTCTCCAGGCCCTCGCCG  
CATCACCCCTCGCCGCGCGAGGTCCCTTTCTTCTCCACCCTCACCGGCGATTTCCTCGATGGCACCGAGCTCGATGCCGGCT  
ACTGGTACCGCAACCTCCGCCATCCTGTGAGTTCATTCCGCCGTCCAGGCCCTCACCGATCAGGGCTACGCCACCTTCATC  
GAGGTCTCCCTCCTCTCCTCGCCTCCTCCGTCAGGAGACCCTCGATGATGCCGAGTCCGATCGCCCGCTCCGGCA  
CCCTCGAGCGCATGCCGCGATGCCGATCGCTTCTCACCGCCTCGCCGATGCCCATACCCGCGCGCTCGCCGTCCGATTG  
GGAGGCCGTCTCGGCCCGCGCCGCCCTCGTCTCGATCTCCCTGGCTACCTTTCCAGGGCAAGCGCTTCTGGCTCCTCCCTGAT  
CGCACCAACCTCGCGATGAGCTCGATGGCTGGTTCTACCGCGTTCGATTGGACCGAGGTCCCTCGTCCGAGCCTCGCCGCC  
TCCGCCGCCGCTGGCTCGTCTCGTCCCTGAGGGCCATGAGGAGGATGGTGGACCGTCCGAGGTCCGCTCCGCCCTCGCCG  
AGGGCGCGCGGAGCCTGAGGTACCCCGCGCGCTCGGCGGCTCGTCCGCCGATTGCGCCGGCGTCTGCTCCTCCTCGCCC  
TCGAGGGCGATGGCGCGTCCAGACCCTCGTCTCGTCCGCGAGCTCGATGCCGAGGGCATCGATGCCCTCTCTGAGACCGT  
CACCTTCGGCGCGCTCGATGCCGGCTCCCTGTCCGCCGCCCTGATCAGGCCAAGCTCTGGGGCTCGGCCAGGTCCGCTC  
CCTCGAGCGCGGCCCTCGTGGACCGGCCCTCGTCGATCTCCCTCATGCTGATCCTGAGCTCCGCGGCCGCTCACCGCC  
GTCTCGCCGGCTCCGAGGATCAGGTCCGCGTCCGCGCCGATGCCGTCCGCCGCCGCCGCCCTCTCCCTGCCCATGTACC  
GCCACCTCCGAGTACGCCGTCCCTGGCGGCACCATCCTCGTACCGGCGGCACCGCCGGCCTCGGCGCCGAGGTCCGCCG  
TGGCTCGCCGGCGCGGCGCGGAGCATCTCGCCCTCGTCTCCGCCGCCGCCCTGATACCGAGGGCGTCCGGCATCTCACC  
GCCGAGTCAACCGCCTCGGCGCCGCGTCTCCGTCCATGCTGCGATGTCTCCTCCCGCAGCCTGTCCCGGAGCTCGTCC  
ATGGCCTCATCGAGCAGGGCGATGTGTCGCGGCGTCTCCATGCCGCCGCCCTCCCTCAGCAGGTCCGCATCAACGATAT  
GGATGAGGCCGCCCTTCGATGAGGTCTGTCGCCGCCAAGGCCGGCGGCCGTCCATCTCGATGAGCTCTGCTCCGATGCCGA  
GCTCTTCTCCTCTTCTCCTCCGGCGCGCGGCTCTGGGGCTCCGCCGCCAGGGCGCCTACGCCGCCGGCAACGCCTTCTC  
GATGCCCTTCGCCCGCCATCGCCGCGGCCGCGGCTCCCTGCCACCTCCGTCCGCTGGGGCTCTGGGCCGCCGGCGGCATG  
ACCGGCGATGAGGAGGCCGTCTCCTTCTCCGCGAGCGCGGCGTCCGCGCCATGCCTGTCCCTCGCGCCCTCGCCGCCCTC  
GATCGCGTCTCGCCTCCGGCGAGACCGCGTCTGTCACCGATGTGATTGGCCTGCCCTTCGCCGAGTCTACACCGCCG  
CCGCCCTCGCCCTCTCCTCGATCGCATCGTACCACCGCCCTTCCGAGCGCGCGGCGAGCCTGAGACCGAGTCCCTCCG  
CGATCGCCTCGCCGGCTCCCTCGCGCCGAGCGACCGCGGAGCTCGTCCGCCCTCGTCCGCACCTCCACCGCCACCGTCT  
CGGCCATGATGATCCTAAGGCCGTCCGCGCCACCACCCTTTCAAGGAGCTCGGCTTCGATTCCCTACCGCCGTCCGCCCTC  
CGCAACCGAGTCCAGCAGGCCACCGGCCCTCGCCCTCCCTGCCACCCTCGTCTTCGAGCATCCTACCGTCCGCCGCCCTCGCCG  
ATCATATCGGCCAGCAGTTCGATTCGGCACCCCTGCCCGCGAGGCCCTCCTCCGCCCTCCGCGATGGCTACCGCCAGGCCG  
CGTCTCGGCCCGCTCCGCTCCTACCTCGATCTCCTCGCGGCCCTCGCGATTTCGCGAGCATTCGATGGCTCCGATGGCT  
TCTCCTCGATCTCGTCTGATGAGGCGATGGCCTGGCGAGGTACCGTCTCTGCTGCGCCGGCACCGCCGCCATCTCCGG  
CCCTCATGAGTTACCCGCTCGCCGGCGGCCCTCCGCGGCATCGCCCTGTCCGCGCGTCCCTCAGCCTGGCTACGAGGA  
GGCGAGCCTCTCCCTTCTCCATGGCCGCCGTCCGCCCGCTCGAGGCCGATGCCGTATCCGCACCCAGGGCGATAGGCCT  
TTGTCGTCGCGGCCATTTCGCCGGCGCCCTCAGGCCATCGCCCTCGCCACCGAGCTCCTCGACCGAGCTCCTCCTCCTC  
GCGGCGTCTCCTCATCGATGTCTACCCTCCTGGCCATCAGGATGCCATGAACGCCTGGCTCGAGGAGCTCACCGCCACCT

CTTCGATCGCGAGACCGTCCGCATGGATGATACCCGCCTACCGCCCTCGGCGCCTACGATCGCCTACCGGCCAGTGGCGC  
CCTCGCGAGACCGGCCTCCCTACCCTCCTCGTCTCCGCCGGCGAGCCATGAGGCCCTTGCCCTGATGATTCTGGGAAGCCTA  
CCTGGCCTTTTCGAGCATGATACCGTCGCCGTCCCTGGCGATCATTTACCATGGTCCAGGAGCATGCCGATGCCATCGCCCGC  
CATATCGATGCCTGGCTCGGCGGGCGCAACTCCTGA

**Codon-optimized PccA:**

ATGCGCAAGGTCTCATCGCCAACCGCGGCGAGATCGCCGTCCGCGTCGCCCCGCGCCTGCCGCGATGCCGGCATCGCCTCC  
GTCGCCGTCTACGCCGATCCTGATCGCGATGCCCTCCATGTCGCGCGCCGCGATGAGGCCCTTCGCCCTCGGCGGCGGATACCC  
CTGCCACCTCTACCTCGATATCGCCAAGGTCTCAAGGCCGCCGCGAGTCCGGCGCCGATGCCATCCATCCTGGCTACGG  
CTTCTCTCCGAGAACGCCGATTTCGCCAGGCCGTCTCGATGCCGGCCTCATCTGGATCGGGCCCTCCTCCTCATGCCATCC  
GCGATCGCGGCGAGAAGGTGCGCGCCGCCCATATCGCCAGCGCGCCGGCGCCCTCTCGTCGCCGGCACCCCTGATCCTG  
TCTCCGGCGCGGATGAGGTGCTGCGCTTCGCCAAGGAGCATGGCCTCCCTATCGCCATCAAGGCCGCCTTCGGCGGGCGGCG  
GCCGCGGCCTCAAGGTGCGCCGACCCCTCGAGGAGTCCCTGAGCTCTACGATTCCGCCGTCCGCGAGGCCGTGCGCCCT  
TCGGCCGCGGCGAGTGCTTCGTGAGCGCTACCTCGATAAGCCTCGCCATGTCGAGACCCAGTGCCTCGCCGATAACCATGG  
CAACGTGCTGTCGTCTCCACCCGCGATTGCTCCCTCCAGCGCCGCCATCAGAAGCTCGTCGAGGAGGCCCTGCCCTTTTC  
CTCTCCGAGGCCAGACCGAGCAGCTCTACTCCTCCTCAAGGCCATCCTCAAGGAGGCCGGCTACGTGCGCGCCGGCACCG  
TCGGTTCCTCGTCGGTCACCGGACCATCTCCTTCCTCGAGGTCAACACCCGCCCTCCAGGTGAGCATCCTGTCAACGAG  
GAGGTGCGCGGCATCGATCTCGTCGCGAGATGTTCCGCATCGCCGATGGCGAGGAGCTCGGCTACGATGATCCTGCCCTCC  
GCGGCCATTCTTCGATTTCGCGATCAACGGCGATCATCCTGGCCGCGGCTTCCTCCCTGCCCTGGCACCGTCACCCCTCTTC  
GATGCCCTACCGGCCCTGGCGTCCGCTCGATGCCGGCGTCGAGTCCGGCTCCGTATCGGCCCTGCCTGGGATTCCCTCC  
TGCCAAGCTCATCGTCAACGGGCCGACCCGCGCCGAGGCCCTCCAGCGCGCCGCCGCCCTCGATGAGTTCACCGTCG  
AGGGCATGGCCACCGCCATCCCTTTCCATCGCACCGTCGTCCGCGATCCTGCCTTCGCCCTGAGCTACCGGCTCCACCGA  
TCCTTTACCGTCCATACCCGCTGGATCGAGACCGAGTTGCTCAACGAGATCAAGCCTTTACACCCCTGCCGATACCGAGA  
CCGATGAGGAGTCCGGCCGCGAGACCGTCGTGTCGAGGTGCGCGGCAAGCGCCTCGAGGTCTCCCTCCCTTCTCCCTCG  
GCATGTCCCTCGCCGCGACCGGCCTCGCCGCCGGCGCCCGCCCTAAGCGCCGCGCCGCCAAGAAGTCCGGCCCTGCCGCT  
CCGGCGATACCTCGCCTCCCTATGCAGGGCACCATCGTCAAGATCGCCGTGAGGAGGGCCAGGAGGTCCAGGAGGGCG  
ATCTCATCGTCGTCTCGAGGCCATGAAGATGGAGCAGCCTCTCAACGCCCATCGCTCCGGCACCATCAAGGGCCTACCGC  
CGAGTCCGGCGCCTCCCTCACCTCCGGCGCCGCCATCTGCGAGATCAAGGATTGA

**Codon-optimized PccB:**

ATGTCGAGCCTGAGGAGCAGCAGCCTGATATCCATACCACCGCCGGCAAGCTCGCCGATCTCCGCCGCCGATCGAGGAGG  
CCACCCATGCCGGCTCCGCCGCGCCGTGAGAAGCAGCATGCCAAGGGCAAGCTACCGCCCGCAGCGCATCGATCTCC  
TCCTCGATGAGGGCTCCTTCGTGAGCTCGATGAGTTCGCCGCCCATCGCTCCACCAACTTCGGCCTCGATGCCAACCGCCT  
TACGGCGATGGCGTCTGTCACCGGTACGGCACCGTCGATGGCCGCCCTGTCGCCGTCTTCTCCCAGGATTTCACCGTCTTCG  
GCGGCCCTTCGGCGAGGTCTACGGCCAGAAGATCGTAAGGTATGGATTTCGCCCTCAAGACCGGCTGCCCTGTGTCGG  
CATCAACGATTCCGGCGGCGCCGCGATCCAGGAGGGCGTGCCTCCCTCGCGCCCTACGGCGAGATCTTCGCCCGCAACAC  
CCATGCCCTCCGGCGTCATCCCTCAGATCTCCCTCGTCTGCGGCCCTTGCGCCGGCGGCGCCGTCTACTCCCTGCCATCAC  
GATTTACCGTCATGGTCGATCAGACCTCCCATATGTTTCATACCGGGCCCTGATGTCATCAAGACCGTCACCGGCGAGGATGTC  
GGCTTCGAGGAGCTCGGCGGCGCCGCGACCCATAACTCCACCTCCGGCGTCGCCCATCATATGGCCGGCGATGAGAAGGAT  
GCCGTGAGTACGTCAAGCAGCTCCTCTCCTACCTCCCTTCCAACAACCTCTCCGAGCCTCCTGCCTCCCTGAGGAGGCCGA  
TCTCGCCGTACCGATGAGGATGCCGAGCTCGATACCATCGTCCCTGATTCCGCCAACAGCCTTACGATATGCATTCCGTCT  
CGAGCATGTCCTCGATGATGCCGAGTCTTCGAGACCCAGCCTCTCTTCGCCCTAACATCCTACCGGCTTCGGCCGCGTCTG  
AGGGCCGCCCTGTGCGCATCGTCCCAACAGCCTATGCAGTTCGCCGGCTGCCTCGATATACCGCCTCCGAGAAGGCCG  
CCGCTTCGTCCGCACCTGCGATGCCTTCAACGTCCCTGTCTCACCTTCGTGATGTCCTGGCTTCCTCCCTGGCGTCTGATC  
AGGAGCATGATGGCATCATCCGCCGCGGCGCCAAGCTCATCTTCGCTACGCCGAGGCCACCGTCCCTCTCATACCGTCTATC  
ACCCGCAAGGCCTTCGGCGGCGCCTACGATGTCATGGGCTCCAAGCATCTCGGCGCCGATCTCAACCTCGCCTGGCCTACCG  
CCCAGATCGCCGTATGGCGGCCAGGGCGCCGTCAACATCCTCCATCGCCGACCATCGCCGATGCCGGCGATGATGCCG  
AGGCCACCGCGCCCGCCTCATCCAGGAGTACGAGGATGCCCTCCTCAACCTTACACCGCCGCCGAGCGCGGCTACGTCTGA  
TGCCGTATCATGCTTCCGATACCCGCCGCCATATCGTCCGCGCCTCCGCCAGCTCCGCACCAAGCGCGAGTCCCTCCCT  
CCTAAGAAGCATGGCAACATCCCTCTCTAA

**Codon-optimized PccE:**

ATGACCATCAAGGTGCTCCGCGGCAACCCTACCCCTGAGGAGCTCGCCGCCGCCCTACCGTCTGTCGCGCCCCGCGCCGTCA  
CCGCCGCCGCCGAGCCTTCCACACCGATCGCCCTCATGATGCCTGGTCCGATCCTCCCGCATGCCACCCATCATATGCCT  
CATCCTGGCCCTACCGCCTGGGGCCGCACCTACTGGCCTACCTGA



#### 4. DEBS1-TE Expression Cassette Construction

The vector pTYGS-*arg* was firstly chosen for *pcc* plasmid construction. All *pcc* gene fragments flanked with overlaps (by *ca* 30 bp) were synthesized commercially. Using an *Asc*I-digested vector pTYGS-*arg* and recovered *pccABE* gene fragments after double restriction enzymatic digestions (*pccA*-*Eco*RI/*Bam*HI, *pccB*-*Xba*I/*Bam*HI, *pccE*-*Bam*HI/*Xba*I), the yeast recombination was performed as previously published protocols.<sup>1</sup>

Yeast colonies were obtained and then collected together to extract plasmids. Subsequently, using standard heat-shock protocols, the extracted plasmid mixture was introduced into *E. coli* *ccdB* survival 2 T1<sup>R</sup>, which is resistant against the CcdB killer protein. A large number of *E. coli* colonies were generated, and then 5 random colonies were identified by colony PCR and restriction enzyme digestion. Lastly, the expression plasmid was successfully constructed (Scheme S4.1). Three subunit genes were inserted downstream of promoters *P<sub>adh</sub>*, *P<sub>gpdA</sub>*, and *P<sub>eno</sub>*, respectively.

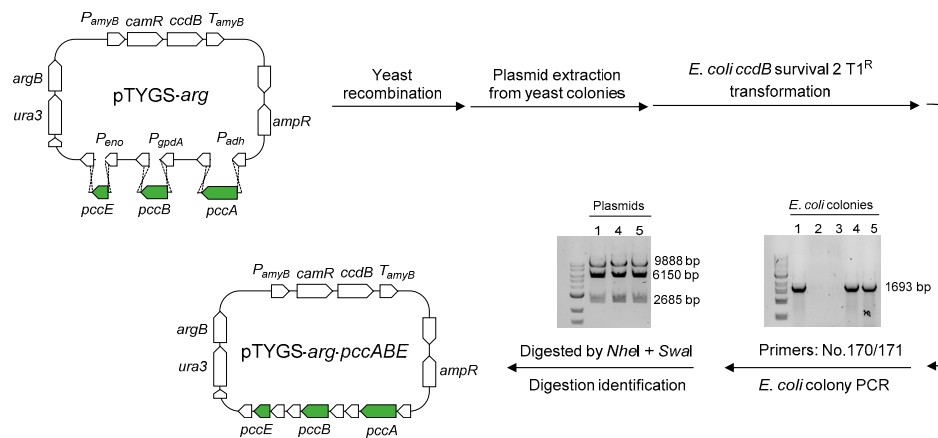

**Scheme S4.1** Construction of the plasmid pTYGS-*arg-pccABE*. For *E. coli* colony PCR, the *pccB* was chosen to perform PCR identification. Primers No.170/171 are located in the *P<sub>gpdA</sub>* and *T<sub>gpdA</sub>*, respectively. For plasmid digestion identification, restriction enzymes *Nhe*I+*Swa*I were chosen. All of DNA bands above were shown as positive.

The vector pEYA was chosen for DEBS1-TE plasmid construction. For the synthetic convenience, the entire DEBS1-TE sequence (~11 kb) was designed as four fragments (~2.8 kb each). Each fragment was designed to overlap with adjacent fragments or the expression vector at both ends (by *ca* 30 bp) for the subsequent yeast recombination. The initiation end of the first fragment and

the termination end of the fourth fragment were respectively attached with homologous fragments, which aim for yeast recombination with the linearized pEYA vector. To avoid the inaccessibility of PCR product due to high GC content, restriction enzyme digestion was required to obtain all desired fragments. Therefore, two different unique restriction enzymes were adhered to ends of each fragment (*debs1te.f1-ScaI/BamHI*; *debs1te.f2-SmaI/HindIII*; *debs1te.f3-EcoRV/XbaI*; *debs1te.f4-DraI/EcoRI*).

The four DEBS1-TE fragments were synthesized commercially in four separate pUC57 vectors. All desired DEBS1-TE fragments and the linearized pEYA vector were prepared by restriction-enzyme digestion and then introduced into competent yeast for homologous recombination (Scheme S2).<sup>1</sup> Two negative controls were set up. After two days of incubation, yeast colonies were produced only on the experimental sample. Then, plasmids were extracted from yeast colonies and immediately introduced into *E. coli* Top10 competent. *E. coli* colonies were screened by PCR identification. In the resulting positive *E. coli* colonies, plasmids were extracted and then identified by restriction enzyme digestion (Scheme S4.2). The empty vector pEYA was used as the control. The extract plasmids were digested by the restriction enzyme *ScaI* and formed two bands (*i.e.* 9182 bp and 7466 bp) which match the predicted sizes. Ultimately, the obtained plasmid was confirmed to be pEYA-*debs1te* by gene sequencing.

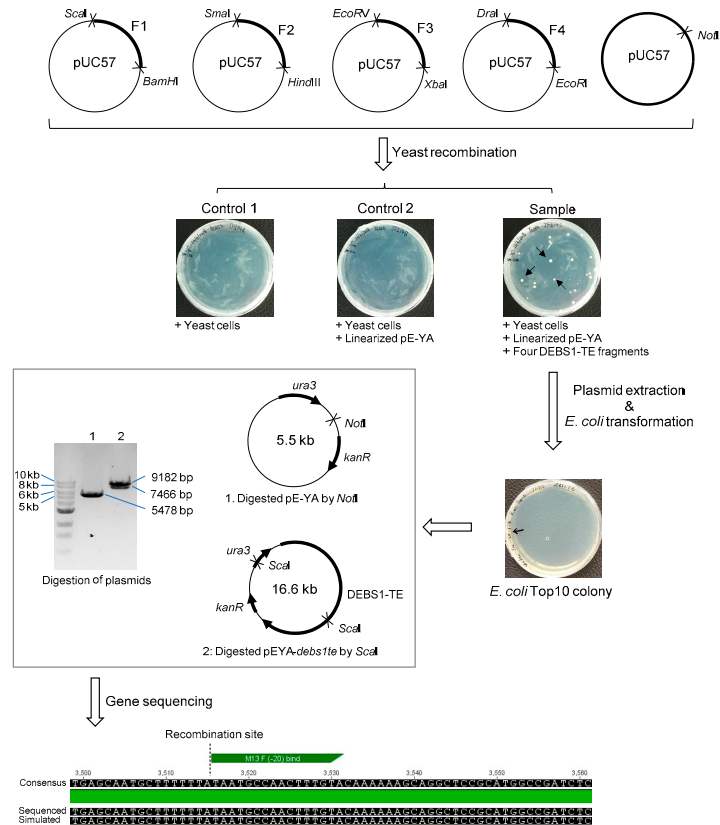

**Scheme S4.2** Yeast recombination, colony screening, and identification of the plasmid pEYA-*debs1te* by restriction enzymatic digestion and gene sequencing.

To construct the final plasmid for DEBS1-TE expression, LR recombination was carried out using pEYA-*debs1te* as the entry clone and pTYGS-*arg-pccABE* as the destination vector.<sup>2</sup> It led to the formation of the plasmid pTYGS-*arg-debs1te-pccABE* harboring *pccABE* genes and DEBS1-TE simultaneously, of which DEBS1-TE locates downstream of the promoter *P<sub>amyB</sub>*.

## 5. Gene Expression Identification of DEBS1-TE and PCC

**A**

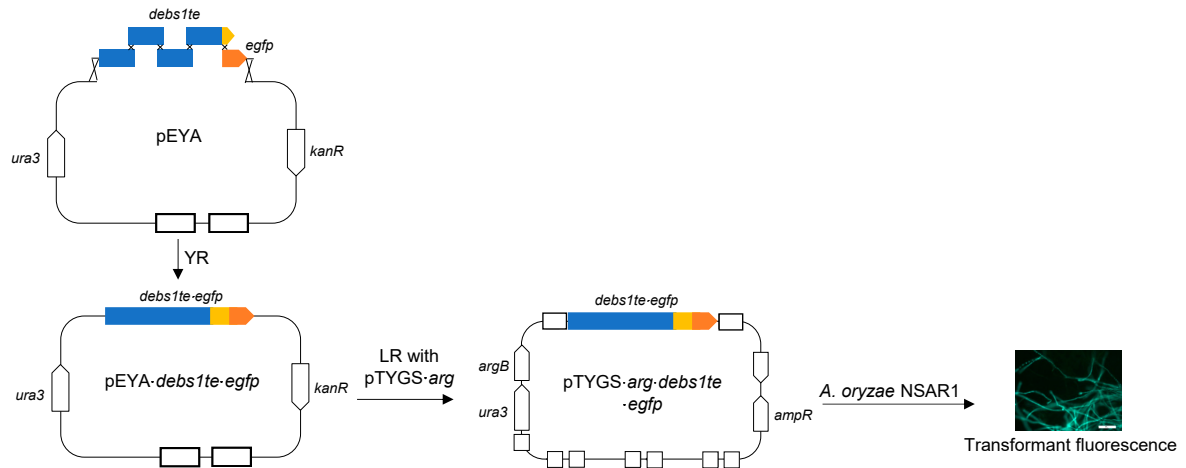

**B**

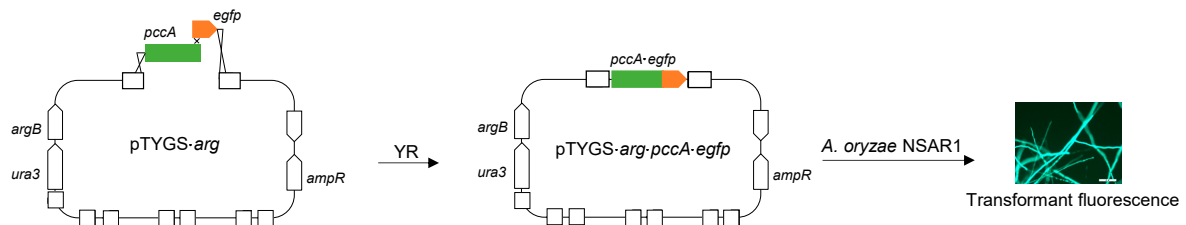

**C**

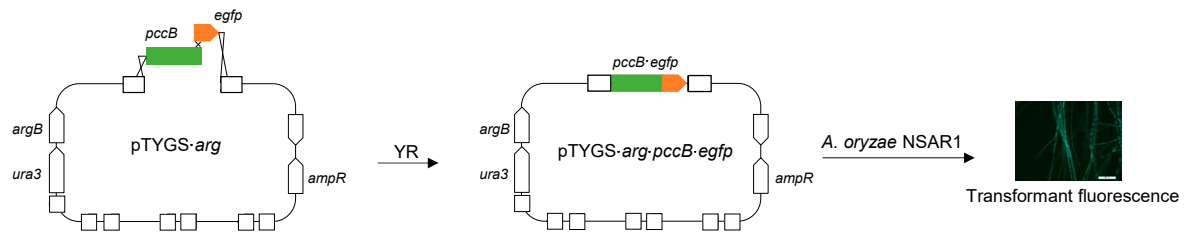

**D**

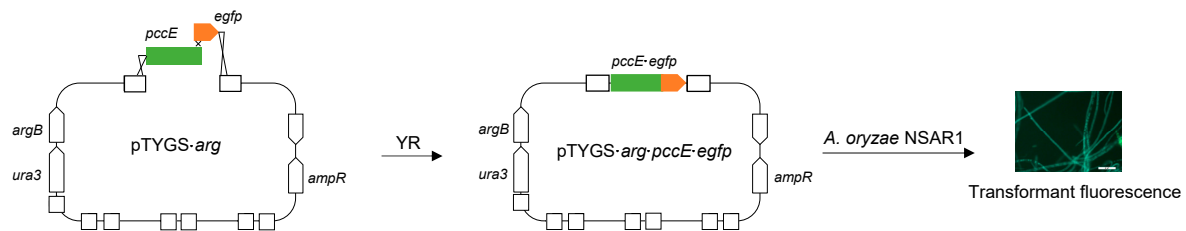

**Scheme S5.1** Green fluorescent imaging of transformants with biosynthetic genes fused to *egfp*: **A**, *egfp* was fused with DEBS1-TE; **B**, *egfp* was fused with *pccA*; **C**, *egfp* was fused with *pccB*; **D**, *egfp* was fused with *pccE*. Abbreviations: YR, yeast recombination; LR, Gateway LR recombination.

## 6. Fungal and Bacterial PPTase Alignment

|                      |                                    |     |
|----------------------|------------------------------------|-----|
| S. erythraea-SePptII | -----miervlpegatwveafddpaeatlfp    | 28  |
| B. subtilis-Sfp      | -----mkiygiymdrpls-qeenerfmetfisp  | 39  |
| A. oryzae-PPTase     | --mqppqdessncmvrwyidtrdltatttslpl  | 50  |
| A. nidulans-NpgA     | mwqdtssastspilrwyidtrpltaastaalpl  | 52  |
|                      | :: : * . : . :                     |     |
| S. erythraea-SePptII | eaaiaravdkrrreffttvrhcarramaelgv   | 74  |
| B. subtilis-Sfp      | dahrtllgdvlvrsvisrqqyl-dksdirfst-- | 78  |
| A. oryzae-PPTase     | dkhmslasnllkylf-ihrtcri-pwnqitiser | 103 |
| A. nidulans-NpgA     | dkhmslasnllkylf-vhrncrri-pwssivisr | 107 |
|                      | : : : . * . : . *                  |     |
| S. erythraea-SePptII | -----pagvvgsmthcagy-----raavvg     | 107 |
| B. subtilis-Sfp      | pdlpdahfnishsgrwvigafd-----sqpig   | 109 |
| A. oryzae-PPTase     | kpieniefnvshqaslvalagtilpssnndsi   | 163 |
| A. nidulans-NpgA     | ytginvefnvshqasmvaiagtaftpnsggds   | 150 |
|                      | . . . * :***                       |     |
| S. erythraea-SePptII | pheplpggvldavslpe-----erarlrel-    | 145 |
| B. subtilis-Sfp      | ktkp-----isl-----eiakrffsktey      | 142 |
| A. oryzae-PPTase     | cvnerrntpetraqledlhgv-----shignd   | 202 |
| A. nidulans-NpgA     | cvnerqgrngeersleslrqyidifsevfsta   | 210 |
|                      | : :*                               |     |
| S. erythraea-SePptII | fsckesvykawfpltgawldfseqadltfda    | 204 |
| B. subtilis-Sfp      | fy-----hlwsmkesfikqegkglslplds     | 195 |
| A. oryzae-PPTase     | fy-----tywalkeayikmtgeallapwlre    | 252 |
| A. nidulans-NpgA     | fy-----tywalkeayikmtgeallapwlre    | 263 |
|                      | * : :. : :. * . : : :              |     |
| S. erythraea-SePptII | aadgfvsai-----vrlrer-----          | 220 |
| B. subtilis-Sfp      | vdpgykmaavcaahpdfpedi--tmvsye--e   | 224 |
| A. oryzae-PPTase     | --gvktwly--gkevedvrlvavafendyli    | 297 |
| A. nidulans-NpgA     | ---gvrttly---knlvvedvrieaalggdyl   | 317 |
|                      | * :                                |     |
| S. erythraea-SePptII | -----                              | 220 |
| B. subtilis-Sfp      | -----                              | 224 |
| A. oryzae-PPTase     | dpwqrlekidiekdvrcatgvcqcl          | 324 |
| A. nidulans-NpgA     | dpwrpfkklidierdiqpcatgvcncl        | 344 |

**Figure S6.1** Sequence alignment of different sources of PPTases (the conserved motifs are highlighted in grey): *S. erythraea* SePptII accession number AAR92400, *B. subtilis* Sfp accession number CAA44858, *A. oryzae* PPTase accession number XP\_023093666 and *A. nidulans* NpqA accession number AAF12814.

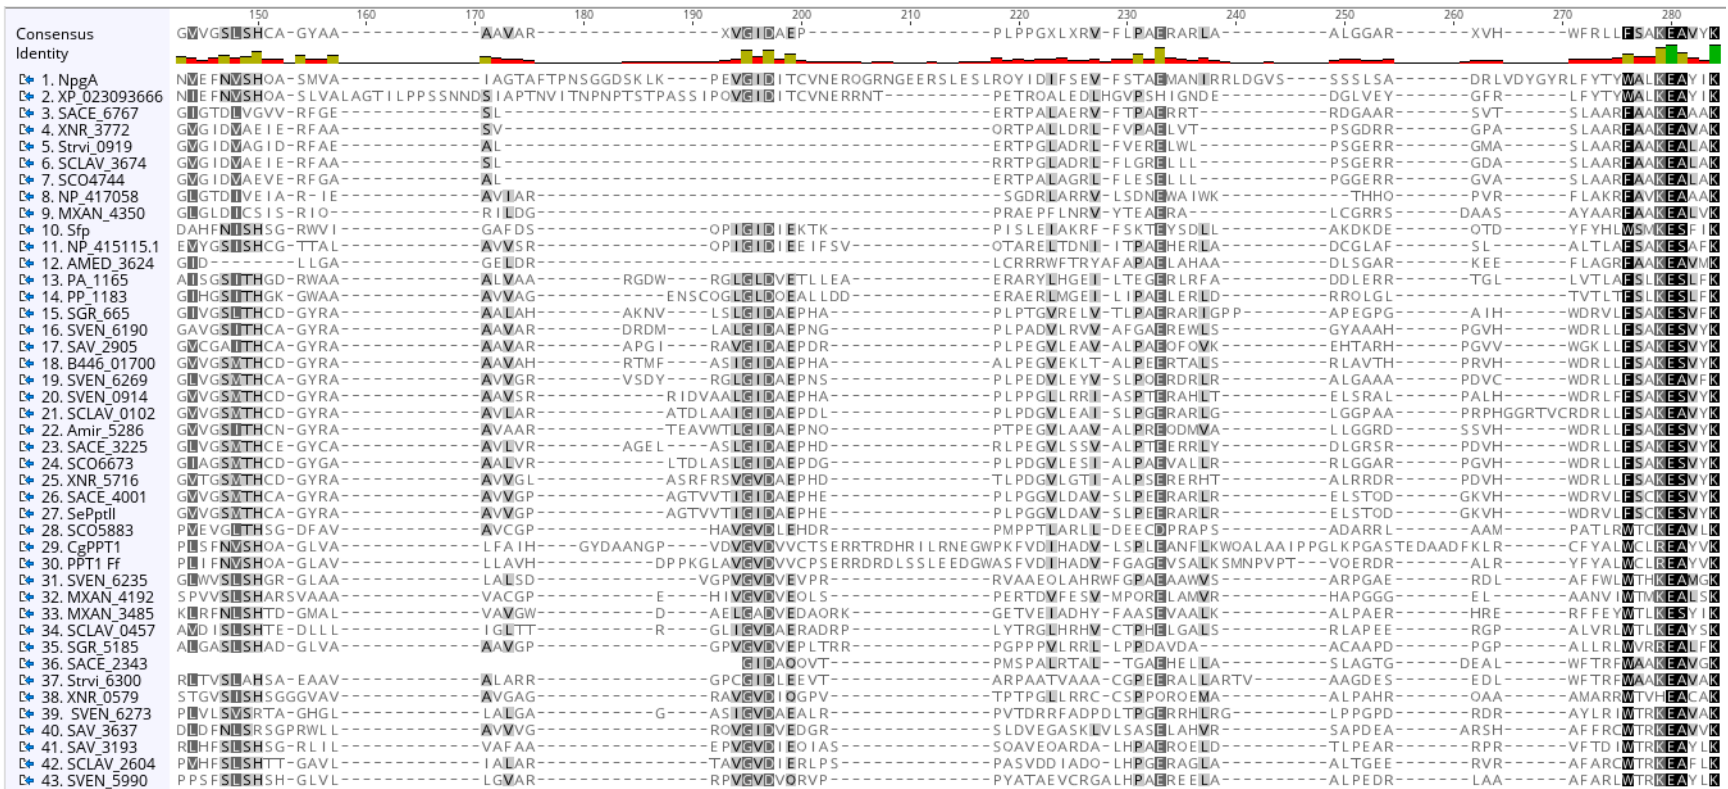

Figure 6.2: Sequence alignment analysis of a wider range of PPTases (adapted from reference 38) displaying the variation in the FxxKESxxK and WxxKEAxxK subtypes.

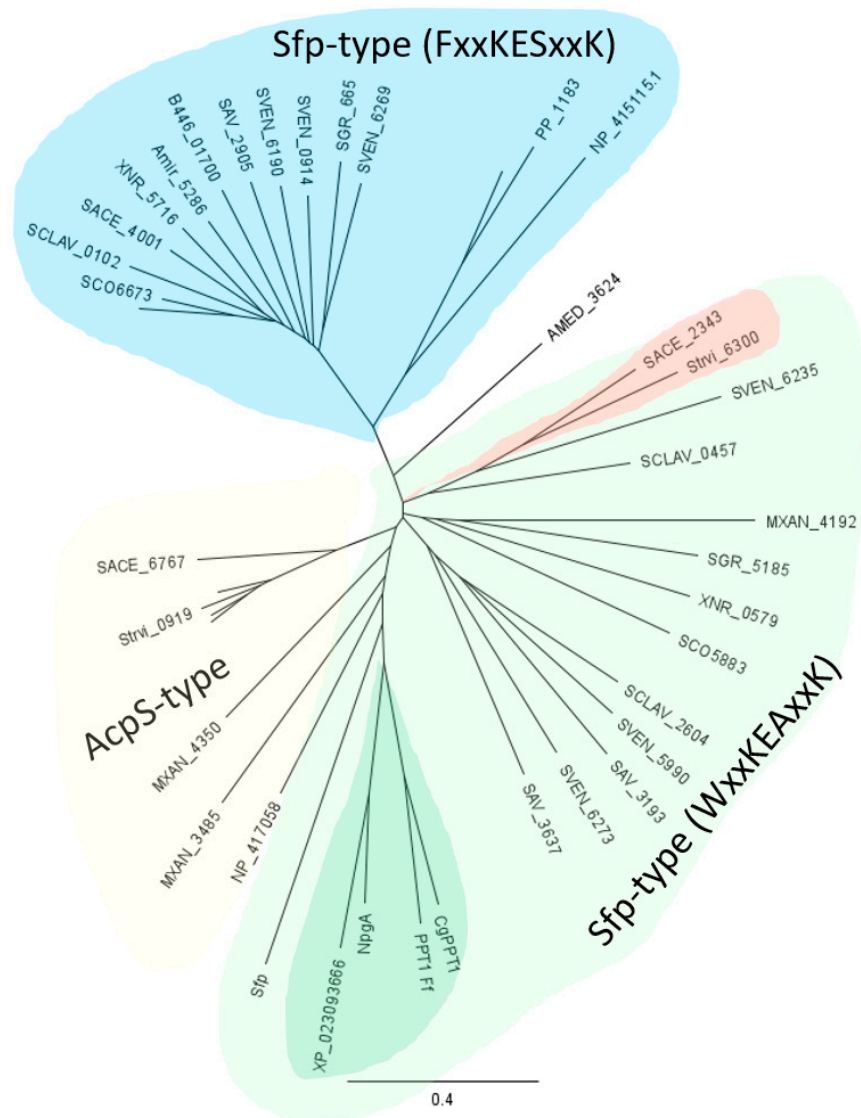

**Figure 6.3:** Phylogenetic analysis of bacterial and fungal PPT. Colour code indicates the different types: yellow = AcpS-type; blue = Sfp type 1 (FxxKESxxK); green = Sfp type 2 (WxxKEAxxK), red = PKS / FAS integrated PPT. Fungal PPTs form a sub-clade within the WxxKEAxxK Sfp family shaded in dark green.

**Codon-optimized Sfp:**

ATGAAGATTTACGGAATTTATATGGACCGCCCGCTTTCCCAGGAAGAGAATGAACGGTTCATGTCTTTCATATCGCCTGAAAAAC  
AGGAGAAATGCCGGAGATTTTATCATAAAGAAGATGCTCACCGCACCCCTGCTAGGAGATGTGCTCGTTCGCTCGGTTATTAGCA  
GGCAGTATCAGCTGGACAAAGCTGACATCCGCTTCAGCGCGCAGGAATACGGGAAGCCTTGCATCCCTGATCTTCCTGACGCC  
CATTTCAACATTTCTCACTCCGGCCGCTGGGTCAATTTGTGCGTTTGATTACACCCGATCGGCATCGATATTGAAAAAATGAAAC  
CGATCAGCCTTGAGATCGCCAAACGTTTCTTTTCAAAAACAGAGTACAGCGACCTTTTAGCAAAAAACAAGGACGAGCAGACAG  
ACTATTTTATCATCTATGGTCAATGAAAGAAAGCTTTATCAAACAGGAAGGCAAAGGCTTATCACTTCCGCTAGATTCCTTTTCA  
GTGCGCCTGCATCAGGACGGACAAGTATCCATTGAGCTTCCGGACAGCCATACACCATGCTATATCAAAACCTATGAGGTGGAT  
CCCGGCTACAAAATGGCCGTATGCGCCGCGCACCCCTGATTTCCCCGAGGATATCACAATGCTCTCGTACGAAGCGCTTTTATAA

**Codon-optimized SePptII:**

ATGATAGAGAGGGTTCTCCCCGAAGGTGCTACCTGGGTAGAAGCATTTCATGATCCAGCAGAGGCTACATTATTCCCCGAAGA  
GGAAGCAGCGATTGCCCGCGCTGTTGATAAAAGACGGAGAGAATTTACTACTGTTAGGCATTGTGCGCGACGAGCGATGGCCG  
AACTCGGAGTTCCCCCTGCCCCTCTACTGCCAGGCGAGCGAGGAGCTCCACAGTGGCCGGCTGGCGTAGTTGGCTCAATGAC  
TCATTGTGCTGGATACCGGGCAGCGGTTCGTAGGACCTGCTGGAACTGTCGTAACGATAGGAATCGACGCGGAACCGCATGAA  
CCATTACCTGGCGGTGTA TAGATGCTGTTTCTTTGCCAGAGGAAAGAGCGCGCCTACGGGAACATCAACCCAGGATGGCAA  
AGTTCATTGGGATAGAGTGTTATTCTTGTAAAGGAAAGTGTGTATAAGGCCTGGTTCCCGCTGACCGGGGCGTGGCTGGACTT  
TGAACAAGCGGATCTCACGTTTCATGCTGCTGGCGGGACCTTCCATGCACGGTTACTCAAACCTGGTGGCCAGGCGGAAGGT  
CGACCGCTGACAGAATTTACTGGTCGTTGGTTAGCCGCAGACGGATTTGTGGTGTCTGCCATCGTCCGACTTAGAGAACGGTG  
A



## 7. Synthesis of TKL

### General

All reactions were performed in oven-dried glassware and under a nitrogen atmosphere. For air or moisture-sensitive reactions the glassware was evacuated and heated out by a heating gun additionally (Schlenk conditions). A magnetic stirrer was used for every reaction. Reactions requiring cooling to -78 °C, a mixture of acetone and dry ice were used. With an ice bath, reactions were cooled to 0 °C. Reactions were heated with silicon oil as a heat bath. The temperature was adjusted by a contact thermometer. Removal of solvents was performed under reduced pressure using a rotary evaporator with a 40 °C water bath temperature unless otherwise stated. All reagents and solvents were used as received from commercial suppliers abcr GmbH, Fisher Chemicals, or Sigma Aldrich unless indicated otherwise. Diisopropylamine was distilled over calcium hydride and stored under an inert nitrogen atmosphere.

Thin-layer chromatography was performed on aluminum-backed silica gel plates F254 of Merck (median pore size 60 Å, layer thickness 0.2 mm, particle size: 5-17 µm) and detected with Cerium (IV) or KMnO<sub>4</sub> dip-reagents and if necessary subsequent heating with a heating gun.

Column flash chromatography was used for purification and performed using the silica gel of Merck with average particle diameter 50 µm (range 40-63 µm, pore diameter 53 Å), and eluents are given in brackets. Column diameter and filling level were adapted to the purification according to the reaction mixture or reaction scale.

LCMS data of the reaction mixture or organic extracts were obtained either by a Waters mass-directed auto purification system (Waters, Milford, Massachusetts, USA) including a Waters 2767 autosampler and a Waters 2545 binary gradient module system, or by a Waters 2795 alliance HT separations module. Both systems are equipped with a Phenomenex Kinetex column (2.6 µm, C<sub>18</sub>, 100 Å, 4.6 × 100 mm; Phenomenex, Torrance, California, USA) and a Phenomenex Security Guard precolumn (Luna, C<sub>5</sub>, 300 Å). Detection methods are a diode array detector from 210-600 nm (DAD; Waters 2998 or Waters 996), an electron light scattering detector (ELSD; Waters 2424) and an electrospray ionization mass detector in the range of 100-1000 m/z (Waters SQD-2 or Waters Micromass ZQ). Gradient was run over 15 min starting at 10 % acetonitrile/ 90 % HPLC grade water and increasing to 90 % acetonitrile/ 10 % HPLC grade water. Acetonitrile was mixed

with 0.05 % formic acid and water with 0.045 % formic acid. The flow rate was 1 mL/min and 20  $\mu$ L of the sample were injected. Data were displayed using the software MassLynx.

The preparative LCMS was used for the purification of compounds from the organic extracts by a Waters mass-directed auto purification system. It is equipped with a Waters 2767 autosampler, a Waters 2545 binary gradient module system, a Phenomenex Kinetex Axia column (5  $\mu$ m, C<sub>18</sub>, 100 Å, 21.2  $\times$  250 mm), and a Phenomenex Security Guard precolumn (Luna, C<sub>5</sub>, 300 Å). Gradient was run over 15 min starting at 10 % acetonitrile/ 90 % HPLC grade water (+ 0.05 % formic acid) and increasing to 90 % acetonitrile/ 10 % HPLC grade water (+ 0.05 % formic acid). The flow rate was 20 mL/min and the post-column flow was split (100:1). The minority flow was made up with HPLC grade acetonitrile + 0.05 % formic acid to a flow rate of 1 mL/min for simultaneous analysis by a diode array detector (DAD, Waters 2998) in the range of 200 to 600 nm, an electron light scattering detector (ELSD; Waters 2424) and a Waters SQD-2 electrospray ionization mass detector in the range of 100 and 1000 m/z. Selected peaks were collected and the solvent was evaporated overnight using a freeze dryer.

NMR spectra were recorded on a Bruker Ascend 400 MHz, Bruker Ultrashield 400MHz, Bruker Ultrashield 500 MHz, or Bruker Ascend 600 MHz spectrometer at 298 K unless otherwise stated and calibrated by using the residual peak of the solvent as the internal standard (CDCl<sub>3</sub>:  $\delta_{\text{H}}$  = 7.26 ppm;  $\delta_{\text{C}}$  = 77.2 ppm; CD<sub>3</sub>OD:  $\delta_{\text{H}}$  = 3.31 ppm;  $\delta_{\text{C}}$  = 49.0 ppm). Two-dimensional proton-carbon correlation techniques (HSQC and HMBC) were used to determine the structure or supplement and complete the <sup>13</sup>C-NMR spectra where signals were otherwise broadened or weak. All spectra were evaluated with MestReNova of Mestrelab Research S. L.

### S-4-benzyl-3-(2*S*,3*R*-3-hydroxy-2-methylpentanoyl)oxazolidin-2-one<sup>3</sup>

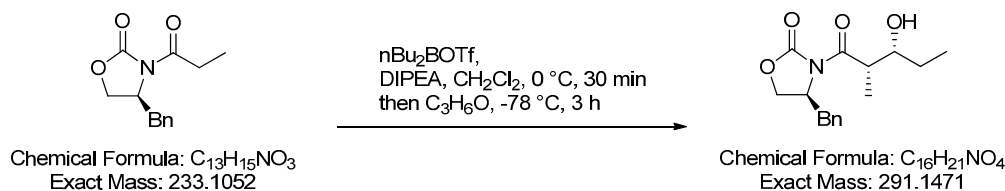

S-4-benzyl-3-propionyloxazolidin-2-one (1.0 g, 4.18 mmol, 1.0 equiv.) was dissolved in anhydrous  $CH_2Cl_2$  (25 mL) and cooled to 0 °C. To the stirred solution was added  $nBu_2BOTf$  (1.0 M in  $CH_2Cl_2$ , 4.7 mL, 4.7 mmol, 1.1 equiv.) dropwise over 15 min. After addition, DIPEA (1.2 mL, 6 mmol, 1.4 equiv.) was added, and stirring continued for an additional 15 min. Then the solution was cooled to -78 °C and propionaldehyde (0.68 mL, 9.42 mmol, 2.2 equiv.) was added dropwise. After addition, the solution was stirred for 3 h at -78 °C, before the reaction was allowed to warm to 0 °C. The reaction was quenched with potassium phosphate buffer (pH 7.1, 15 mL), MeOH (8 mL), and MeOH/30 %- $H_2O_2$  (25 mL, 2:1). After stirring 1 h at 0 °C the aqueous layer was extracted with  $CH_2Cl_2$  (3 × 50 mL). The combined organic layers were washed with saturated  $NaHCO_3$ - and NaCl-Solution, dried over  $MgSO_4$ , filtered, and concentrated under reduced pressure. The crude aldol product was used in the next step without further purification.

**S-4-benzyl-3-(2*S*,3*R*-3-((*tert*-butyldimethylsilyl)oxy)-2-methylpentanoyl)oxazolidin-2-one<sup>3</sup>**

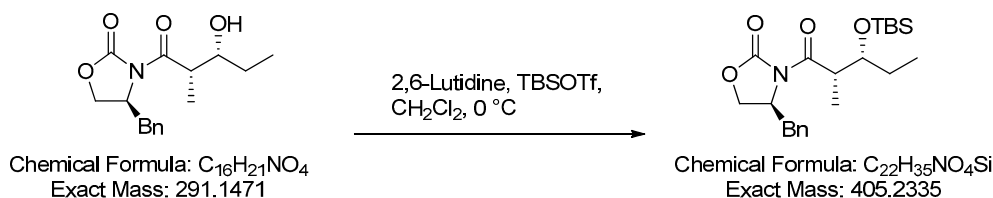

*S*-4-benzyl-3-(2*S*,3*R*-3-hydroxy-2-methylpentanoyl)oxazolidin-2-one (1.26 g, 4.32 mmol, 1.0 equiv.) was dissolved in anhydrous CH<sub>2</sub>Cl<sub>2</sub> (20 mL) and cooled to 0 °C. Then 2,6-Lutidine (0.75 mL, 6.48 mmol, 1.5 equiv.) and TBSOTf (1.5 mL, 6.48 mmol, 1.5 equiv.) were added dropwise. After stirring for 1 h, the solution was allowed to warm to room temperature and stirred for an additional 30 min. After completion, the reaction was quenched by the addition of saturated NH<sub>4</sub>Cl-solution (15 mL). The aqueous phase was extracted with CH<sub>2</sub>Cl<sub>2</sub> (3 × 20 mL), dried over MgSO<sub>4</sub>, filtered, and concentrated under reduced pressure. The crude product was dissolved in CH<sub>2</sub>Cl<sub>2</sub> and purified by flash chromatography on silica gel (PE:EtOAc = 4:1). The TBS-protected product was obtained as a colorless solid (1.6 g, 3.94 mmol, 94 % over two steps). *R*<sub>f</sub> = 0.78 (PE:EtOAc = 4:1); <sup>1</sup>H NMR (400 MHz, CDCl<sub>3</sub>) δ = 7.35-7.27 (m, 3H, Bn), 7.23-7.21 (m, 2H, Bn), 4.60 (ddt, *J* = 9.5, 6.5, 3.2 Hz, 1H, NCHBn), 4.19-4.16 (m, 2H, OCH<sub>2</sub>CHBn), 3.96 (q, *J* = 5.6 Hz, 1H, CH(OTBS)CH<sub>2</sub>), 3.91-3.85 (m, 1H, C(O)CHCH<sub>3</sub>), 3.30 (dd, *J* = 13.3, 3.1 Hz, 1H, BnCH<sub>2</sub>), 2.77 (dd, *J* = 13.3, 9.7 Hz, 1H, BnCH<sub>2</sub>), 1.60-1.52 (m, 2H, CH<sub>3</sub>CH<sub>2</sub>CH), 1.21 (d, *J* = 6.8 Hz, 3H, CH<sub>3</sub>CHC(O)), 0.89 (m, 9H, OSiC(CH<sub>3</sub>)<sub>3</sub>), 0.86 (s, 3H, CH<sub>3</sub>CH<sub>2</sub>), 0.04 (s, 3H, OSiCH<sub>3</sub>C(CH<sub>3</sub>)<sub>3</sub>), 0.01 (s, 3H, OSiCH<sub>3</sub>C(CH<sub>3</sub>)<sub>3</sub>).

## 2*R*,3*R*-3-((*tert*-butyldimethylsilyl)oxy)-2-methylpentan-1-ol<sup>4</sup>

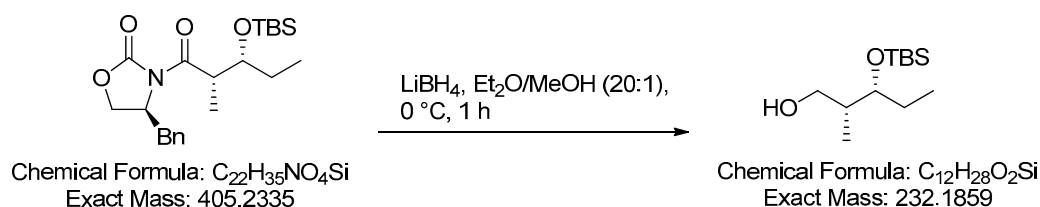

*S*-4-benzyl-3-(2*S*,3*R*-3-((*tert*-butyldimethylsilyl)oxy)-2-methylpentanoyl)oxazolidin-2-one (1.0 g, 2.46 mmol, 1.0 equiv.) was dissolved in Et<sub>2</sub>O:MeOH (25 mL, 20:1) and cooled to 0 °C. LiBH<sub>4</sub> (81 mg, 3.70 mmol, 1.5 equiv.) was added subsequently to the solution and stirred for 1 h. After completion, the reaction was quenched with HCl (1M, 10 mL), and the aqueous layer was extracted with CH<sub>2</sub>Cl<sub>2</sub> (3 × 20 mL). The combined organic layers were dried over MgSO<sub>4</sub>, filtered, and concentrated under reduced pressure. The crude product was dissolved in CH<sub>2</sub>Cl<sub>2</sub> and purified by flash chromatography on silica gel (CH<sub>2</sub>Cl<sub>2</sub>:Et<sub>2</sub>O = 99:1). The reduced alcohol product 2*R*,3*R*-3-((*tert*-butyldimethylsilyl)oxy)-2-methylpentan-1-ol was obtained as a colorless oil (420 mg, 1.80 mmol, 73.5 %). *R*<sub>f</sub> = 0.70 (CH<sub>2</sub>Cl<sub>2</sub>:Et<sub>2</sub>O = 99:1); <sup>1</sup>H NMR (400 MHz, CDCl<sub>3</sub>) δ = 3.72-3.66 (m, 2H, OHCH<sub>2</sub>), 3.52 (dd, *J* = 10.6, 5.1 Hz, 1H, CHOTBS), 2.65 (bs, 1H, OH), 2.06-1.87 (m, 1H, OHCH<sub>2</sub>CH), 1.58-1.47 (m, 2H, CH<sub>3</sub>CH<sub>2</sub>COTBS), 0.91-0.88 (m, 12H, OSi(CH<sub>3</sub>)<sub>2</sub>C(CH<sub>3</sub>)<sub>3</sub>, CH<sub>3</sub>CH<sub>2</sub>), 0.81 (d, *J* = 7.0 Hz, 3H, CH<sub>3</sub>CH), 0.09 (s, 3H, OSi(CH<sub>3</sub>)<sub>2</sub>C(CH<sub>3</sub>)<sub>3</sub>), 0.07 (s, 3H, OSi(CH<sub>3</sub>)<sub>2</sub>C(CH<sub>3</sub>)<sub>3</sub>).

## 2*S*,3*R*-3-((*tert*-butyldimethylsilyl)oxy)-2-methylpentanal<sup>5</sup>

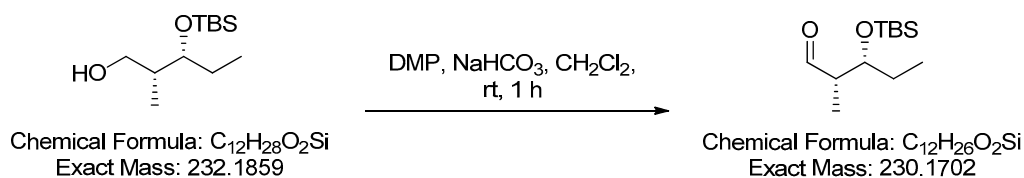

2*R*,3*R*-3-((*tert*-butyldimethylsilyl)oxy)-2-methylpentan-1-ol (400 mg, 1.72 mmol, 1.0 equiv.) was dissolved in  $CH_2Cl_2$  (20 mL) and  $NaHCO_3$  (84.0 mg, 1.03 mmol, 0.6 equiv.) was added. To the reaction mixture, Dess-Martin periodinane (873 mg, 2.06 mmol, 1.2 equiv.) was added subsequently, and stirring continued for 1 h at rt. The reaction was quenched by the addition of aq.  $Na_2S_2O_3$  (10 mL) and stirred for 1 h. The layers were separated and the aqueous layer was extracted with  $CH_2Cl_2$  (3x 15 mL). The combined organic layers were dried over  $MgSO_4$ , filtered, and concentrated under reduced pressure. The crude product was dissolved in  $CH_2Cl_2$  and purified by flash chromatography (PE:EtOAc = 20:1) to furnish aldehyde 2*S*,3*R*-3-((*tert*-butyldimethylsilyl)oxy)-2-methylpentanal as a colorless liquid (305 mg, mmol, 74 %), which was used immediately in the next step.  $R_f$  = 0.81 ( $CH_2Cl_2$ :Et<sub>2</sub>O = 99:1);  $^1H$  NMR (400 MHz,  $CDCl_3$ )  $\delta$  = 9.77 (d,  $J$  = 0.8 Hz, 1H *CHO*), 4.03 (td,  $J$  = 6.5, 3.7 Hz, 1H, *CHOTBS*), 2.46 (qdd, 6.9, 3.6, 1.0 Hz, 1H, *COCHCH*<sub>3</sub>), 1.55-1.47 (m, 2H, *CH*<sub>3</sub>*CH*<sub>2</sub>*COTBS*), 1.06 (d,  $J$  = 6.9 Hz, 3H, *CH*<sub>3</sub>*CH*), 0.91-0.89 (m, 3H, *CH*<sub>3</sub>*CH*<sub>2</sub>), 0.86 (s, 9H, *OSi*(*CH*<sub>3</sub>)<sub>2</sub>*C*(*CH*<sub>3</sub>)<sub>3</sub>), 0.06 (s, 3H, *OSi*(*CH*<sub>3</sub>)<sub>2</sub>*C*(*CH*<sub>3</sub>)<sub>3</sub>), 0.04 (s, 3H, *OSi*(*CH*<sub>3</sub>)<sub>2</sub> *C*(*CH*<sub>3</sub>)<sub>3</sub>);  $^{13}C$  NMR (100 MHz,  $CDCl_3$ )  $\delta$  = 205.6 (t, *CHO*), 73.5 (t, *CHOTBS*), 50.9 (t, *COCHCH*<sub>3</sub>), 27.5 (s, *CH*<sub>2</sub>*CH*<sub>3</sub>), 25.9 (p, *OSi*(*CH*<sub>3</sub>)<sub>2</sub>*C*(*CH*<sub>3</sub>)<sub>3</sub>), 18.1 (q, *OSi*(*CH*<sub>3</sub>)<sub>2</sub>*C*(*CH*<sub>3</sub>)<sub>3</sub>), 10.2 (p, *CH*<sub>3</sub>*CH*<sub>2</sub>), 7.7 (p, *CH*<sub>3</sub>*CH*), -4.0 (p, *OSi*(*CH*<sub>3</sub>)<sub>2</sub>*C*(*CH*<sub>3</sub>)<sub>3</sub>), -4.5 (p, *OSi*(*CH*<sub>3</sub>)<sub>2</sub>*C*(*CH*<sub>3</sub>)<sub>3</sub>).

***R*-4-benzyl-3-((2*R*,3*S*,4*R*,5*R*)-5-((*tert*-butyldimethylsilyl)oxy)-3-hydroxy-2,4-dimethylheptanoyl)oxazolidin-2-one<sup>6</sup>**

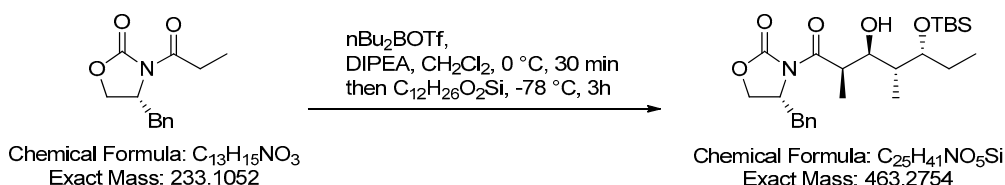

*R*-4-benzyl-3-propionyloxazolidin-2-one (424 mg, 1.82 mmol, 1.2 equiv.) was dissolved in anhydrous CH<sub>2</sub>Cl<sub>2</sub> (10 mL) and cooled to 0 °C. To the stirred solution *n*Bu<sub>2</sub>BOTf (1.0 M in CH<sub>2</sub>Cl<sub>2</sub>, 1.84 mL, 1.84 mmol, 1.2 equiv.) was added dropwise over 15 min. After addition, DIPEA (0.45 mL, 2.25 mmol, 1.4 equiv.) was added, and stirring continued for an additional 15 min. Then the solution was cooled to -78 °C and 2*S*,3*R*-3-((*tert*-butyldimethylsilyl)oxy)-2-methylpentanal (300 mg, 1.30 mmol, 1.0 equiv.) was added dropwise. After addition, the solution was stirred for 3h at -78 °C, before the reaction was allowed to warm to 0 °C. The reaction was quenched with potassium phosphate buffer (pH 7.1, 8 mL), MeOH (4 mL), and MeOH/30 %-H<sub>2</sub>O<sub>2</sub> (12 mL, 2:1). After stirring 1 h at 0 °C the aqueous layer was extracted with CH<sub>2</sub>Cl<sub>2</sub> (3 × 20 mL). The combined organic layers were washed with saturated NaHCO<sub>3</sub>- and NaCl-Solution, dried over MgSO<sub>4</sub>, filtered, and concentrated under reduced pressure. The crude product was dissolved in CH<sub>2</sub>Cl<sub>2</sub> and purified by flash chromatography (PE:EtOAc = 20:1). The aldol product was obtained as a colorless oil (428 mg, 0.92 mmol, 71 %). *R*<sub>f</sub> = 0.75 (PE:EE 4:1), <sup>1</sup>H NMR (400 MHz, CDCl<sub>3</sub>) δ = 7.36-7.26 (m, 3H, Bn), 7.23-7.20 (m, 2H, Bn), 4.72-4.66 (m, 1H, NCHBn), 4.24-4.15 (m, 2H, OCH<sub>2</sub>CHBn), 4.02 (d, *J* = 9.8 Hz, 1H, CHOH), 3.89-3.83 (m, 1H, CHOTBS), 3.35 (dd, *J* = 13.3, 3.2 Hz, BnCH<sub>2</sub>), 2.75 (dd, *J* = 13.3, 9.8, Hz, 1H BnCH<sub>2</sub>), 1.83 (m, 1H, COCHCOH), 1.59-1.51 (m, 2H, CH<sub>3</sub>CH<sub>2</sub>CH) 1.22 (d, *J* = 6.9 Hz, CH<sub>3</sub>CHCOH) 0.90 (s, 9H, OSi(CH<sub>3</sub>)<sub>2</sub>C(CH<sub>3</sub>)<sub>3</sub>), 0.85 (d, *J* = 7.1 Hz, 3H, CH<sub>3</sub>CHCOTBS) 0.12 (s, 3H, OSi(CH<sub>3</sub>)<sub>2</sub>C(CH<sub>3</sub>)<sub>3</sub>), 0.08 (s, 3H, OSi(CH<sub>3</sub>)<sub>2</sub>C(CH<sub>3</sub>)<sub>3</sub>).

**3*R*,4*S*,5*R*,6*R*-6-ethyl-4-hydroxy-3,5-dimethyltetrahydro-2H-pyran-2-one (Triketide lactone)<sup>7,8</sup>**

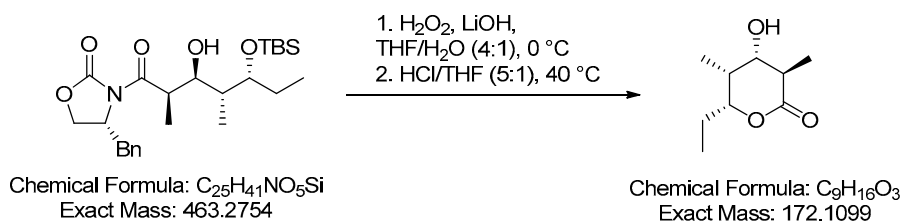

*R*-4-benzyl-3-((2*R*,3*S*,4*R*,5*R*)-5-((tert-butyldimethylsilyl)oxy)-3-hydroxy-2,4-dimethylheptan-oyl)oxazolidin-2-one (200 mg, 0.43 mmol, 1.0 equiv.) was dissolved in THF:H<sub>2</sub>O (3 mL, 4:1) and cooled to 0 °C. To the solution, H<sub>2</sub>O<sub>2</sub> (30 % in H<sub>2</sub>O, 170 µL, 1.72 mmol, 4.0 equiv.) was first added dropwise followed by LiOH (1M in H<sub>2</sub>O, 690 µL, 0.69 mmol, 1.6 equiv.). After stirring for 2h the volatiles were removed under reduced pressure, the remaining aqueous layer was adjusted to pH 1 with 1M HCl and extracted with CH<sub>2</sub>Cl<sub>2</sub> (3 × 3 mL). The organic layers were combined and concentrated under reduced pressure. The residue was then dissolved in 1M HCl:THF (5 mL, 5:1) and heated to 40 °C for 5 h. The pH of the aqueous phase was adjusted to 7 with 1M NaOH and extracted with CH<sub>2</sub>Cl<sub>2</sub> (3 × 5 mL). The combined organic layers were dried over MgSO<sub>4</sub>, filtered, and concentrated under reduced pressure. The crude product was dissolved in CH<sub>2</sub>Cl<sub>2</sub> and purified by flash column chromatography. The triketide lactone was obtained as a colorless oil (52 mg, 0.30 mmol, 67 % yield). **R<sub>f</sub>** = 0.32 (PE:EtOAc 2:1); **<sup>1</sup>H NMR** (400 MHz, CDCl<sub>3</sub>)  $\delta$  = 4.13 (ddd, *J* = 8.3, 6.3, 2.3 Hz, 1H, CHO), 3.82 (dt, *J* = 10.2, 4.5 Hz, 1H, CHOH), 2.46 (qd, *J* = 10.3, 7.1 Hz, 1H, CH<sub>3</sub>CHC(O)), 2.16 (qdd, *J* = 7.0, 4.1, 2.4 Hz, 1H, CH<sub>3</sub>CHCO) 1.87-1.76 (m, 2H, CHCH<sub>3</sub>, OH), 1.62-1.50 (m, 2H, CH<sub>2</sub>CH<sub>3</sub>), 1.40 (d, *J* = 7.1 Hz, 3H, CH<sub>3</sub>CHC(O)), 1.00 (t, *J* = 7.5 Hz, 3H, CH<sub>3</sub>CH), 0.96 (d, *J* = 7.1 Hz, 3H, CH<sub>3</sub>CH<sub>2</sub>); ***m/z*** (**ES**<sup>+</sup>), 345.4 [M<sub>2</sub>]<sup>+</sup>, 195.2 [M]<sup>+</sup>Na<sup>+</sup>, 173.2 [M]<sup>+</sup>, 155.2 [M-H<sub>2</sub>O]<sup>+</sup>, 137.2 [M-2H<sub>2</sub>O]<sup>+</sup>.



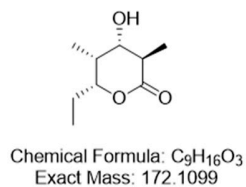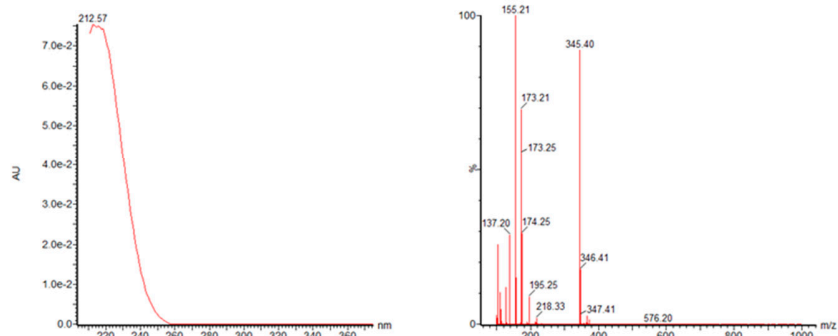

**Fig. S7.1** Structure (left), UV Spectrum (middle), and fragmentation pattern (ES+ right) of triketide lactone TKL.

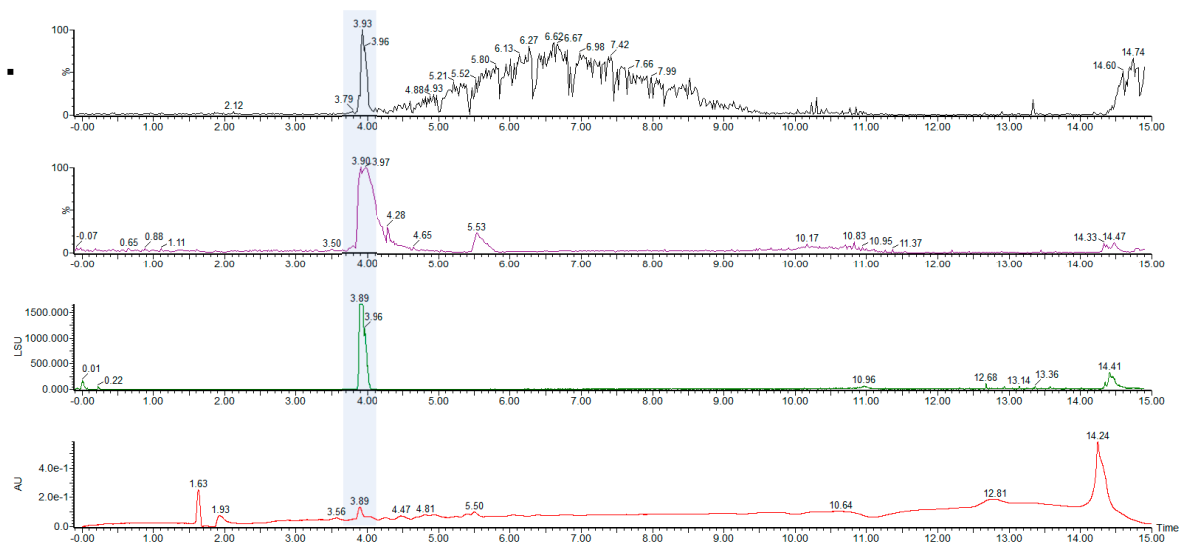

**Fig. S7.2** LC-MS analysis of purified triketide lactone TKL, UV (diode array scan, 200-600 nm, red), ELSD (electron light scattering, green), ES+ (violet), ES- (black).

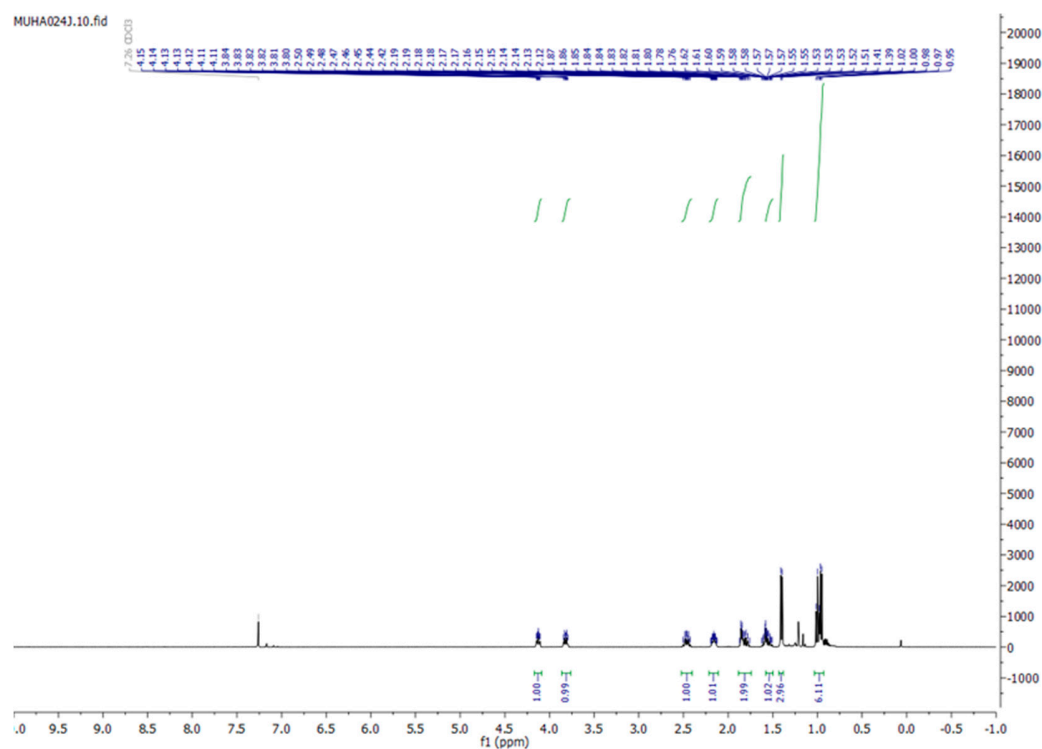

**Fig. S7.3** <sup>1</sup>H NMR of triketide lactone TKL recorded at 400 MHz in CDCl<sub>3</sub>.

## 8. Determination and Quantification of TKL

The authentic triketide lactone TKL was chemically synthesized. Using it as the control, the crude extract from *A. oryzae* was comparatively analyzed with the method of selected ion recording (SIR) by LCMS (Figure S8.1). Only the peak with  $[M+H]^+$  173 was set to record on ES+ TIC chromatogram. It turned out that peaks recorded on both of SIR chromatograms had the identical retention time (Figure S8.1 A-B). Subsequently, the authentic TKL with the concentration of  $20\ \mu\text{g}\cdot\text{mL}^{-1}$  was mixed with the crude extract from *A. oryzae* at the volume ratio of 1:1, followed by SIR analysis on LCMS. It also demonstrated that it was a homogenous peak, not splitting into two peaks (Figure S8.1 C). Moreover, the fragmentation pattern of the authentic TKL was also consistent with that of the newly-formed product from *A. oryzae*. The parent ion  $m/z$  173 and the daughter ion  $m/z$  155 were predominantly present on both of samples (Figure S8.1 D-E).

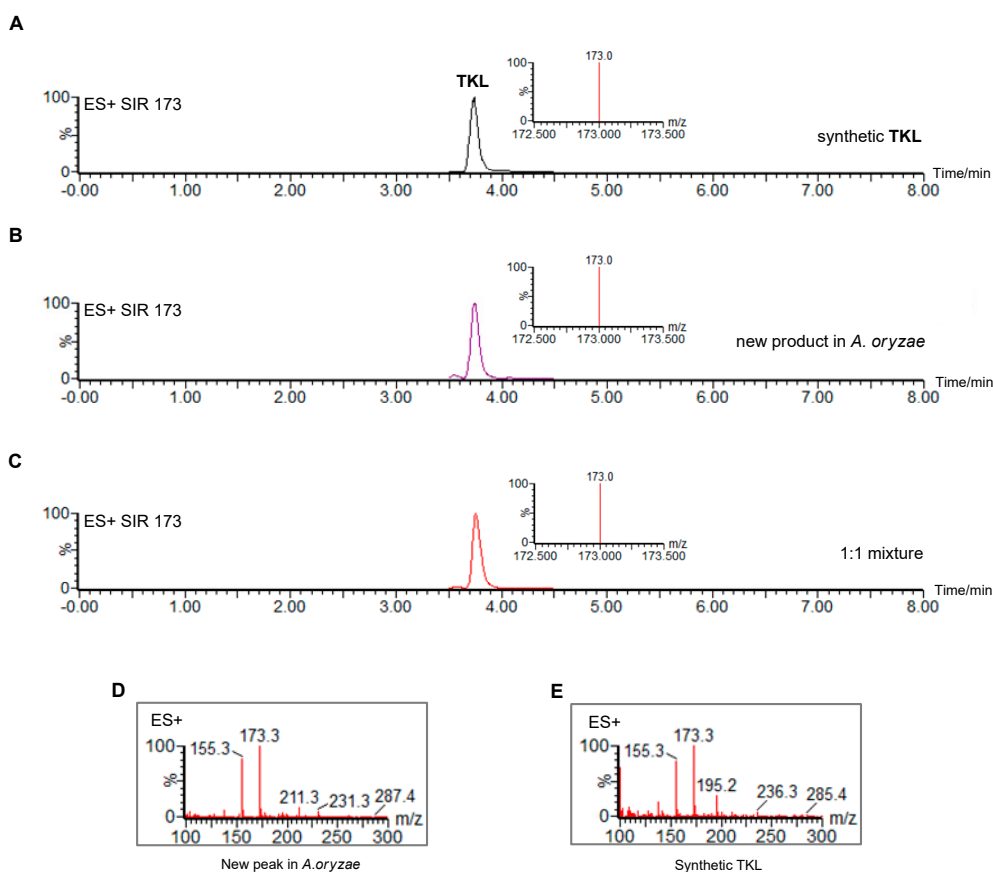

**Figure S8.1** Comparative analysis of the synthetic TKL and the crude extract from *A. oryzae* transformant: **A**, ES+ SIR chromatogram of synthetic TKL; **B**, ES+ SIR chromatogram of crude extract from *A. oryzae* transformant; **C**, ES+ SIR chromatogram of 1:1 mixture of samples above; **D**, ES+ TIC fragmentation of the newly-formed product in *A. oryzae*; **E**, ES+ TIC fragmentation of the synthetic TKL.

A standard method was established for the titer measurement of triketide lactone using the authentic compound. First, the authentic compound was dissolved in methanol and diluted to different concentrations from  $2.5 \mu\text{g}\cdot\text{mL}^{-1}$  to  $200 \mu\text{g}\cdot\text{mL}^{-1}$ . Each concentration was analyzed and the corresponding product peak on SIR (single ion recording) LCMS chromatogram was integrated. Then, a calibration curve was made based on the concentrations and peak areas of the authentic compound (Figure S8.2). Then, a standard extraction workflow was determined. The transformant was inoculated in 100 mL DPY media. After 4 days of cultivation, 50 mM sodium propionate was added into the culture. The culture with propionate was incubated overnight. Next, the five-day culture was extracted with the same volume of ethyl acetate twice. The organic phase was gathered and evaporated to dryness. The concentrated extract was re-dissolved in 1.5 mL methanol. Subsequently, the extract suspension was diluted 10 times with methanol. The sample was centrifuged at  $14,000 \times g$  for 5 min. Lastly, the supernatant was collected and analyzed by LCMS using the SIR detection method.

The extract from 100 mL of the transformant culture were applied to the quantitative analysis based on the calibration curve. By calculation, the titer of the triketide lactone product in *A. oryzae* was approximately  $0.6 \text{ mg}\cdot\text{L}^{-1}$ .

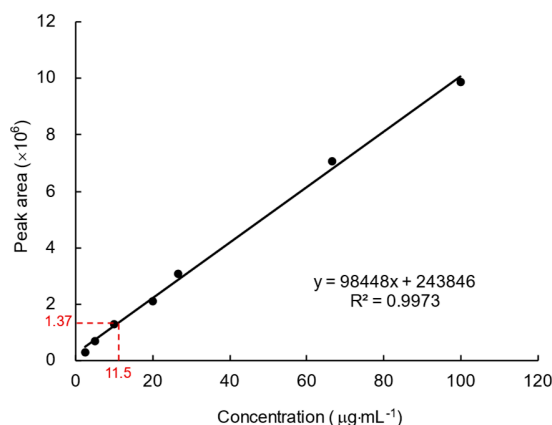

**Figure S8.2** The establishment of the calibration curve for the titer calculation of the product. The red numbers are the calculated values of the product produced by *A. oryzae* transformant.

## 9. Deletion of Propionyl-CoA Degradation Pathways

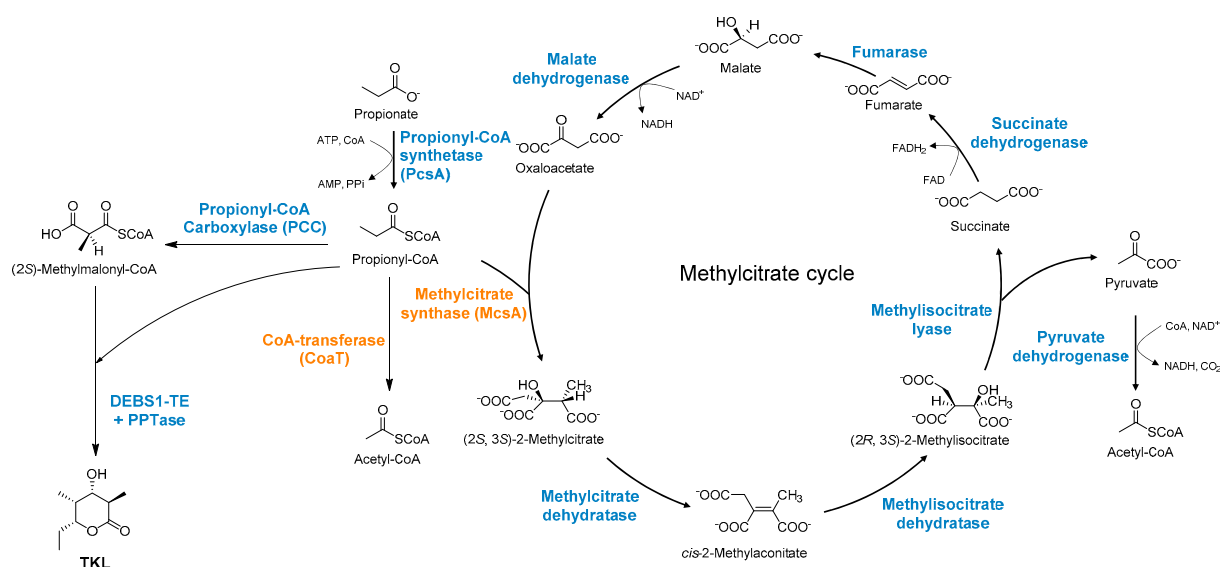

**Scheme S9.1** Overall metabolic pathways of DEBS1-TE in engineered *A. oryzae* transformant. The orange enzymes represent the degradation pathway of the starter unit propionyl-CoA.

To block propionyl-CoA degradation pathways in *A. oryzae* NSAR1, gene knockout were considered with auxotrophic markers. Given that *A. oryzae* NSAR1 is a quadruple auxotrophic strain (*niaD*<sup>-</sup>, *argB*<sup>-</sup>, *adeA*<sup>-</sup>, and *sC*<sup>-</sup>), the selection marker *argB* was first used for *mcsA* gene knockout.

The *mcsA* gene knockout cassette with the auxotrophic marker *argB* was constructed by yeast recombination, and the bipartite gene knockout-based fungal transformation was carried out as previously published protocols (Figure S9.2 A).<sup>9,10</sup> After transformant screening, 48 transformants were obtained followed by genomic DNA extraction. Next, all genomic DNA samples were identified by PCR using multiple primers. 3 out of 48 transformants were determined as positive *mcsA* mutants (JFI98D, JFI98E and JFI98L). When using primers JF74F and JF74R, an expected PCR band was observed with the size of 3304 bp, that is distinctively different from 1758 bp in the NSAR1 strain (Figure S9.2 B). When one of primers was located within *argB*, the accurate PCR bands were also obtained in three positive transformants (Figure S9.2 C-D). Evidently, it demonstrated that *mcsA* gene had been deleted in this mutant strain.

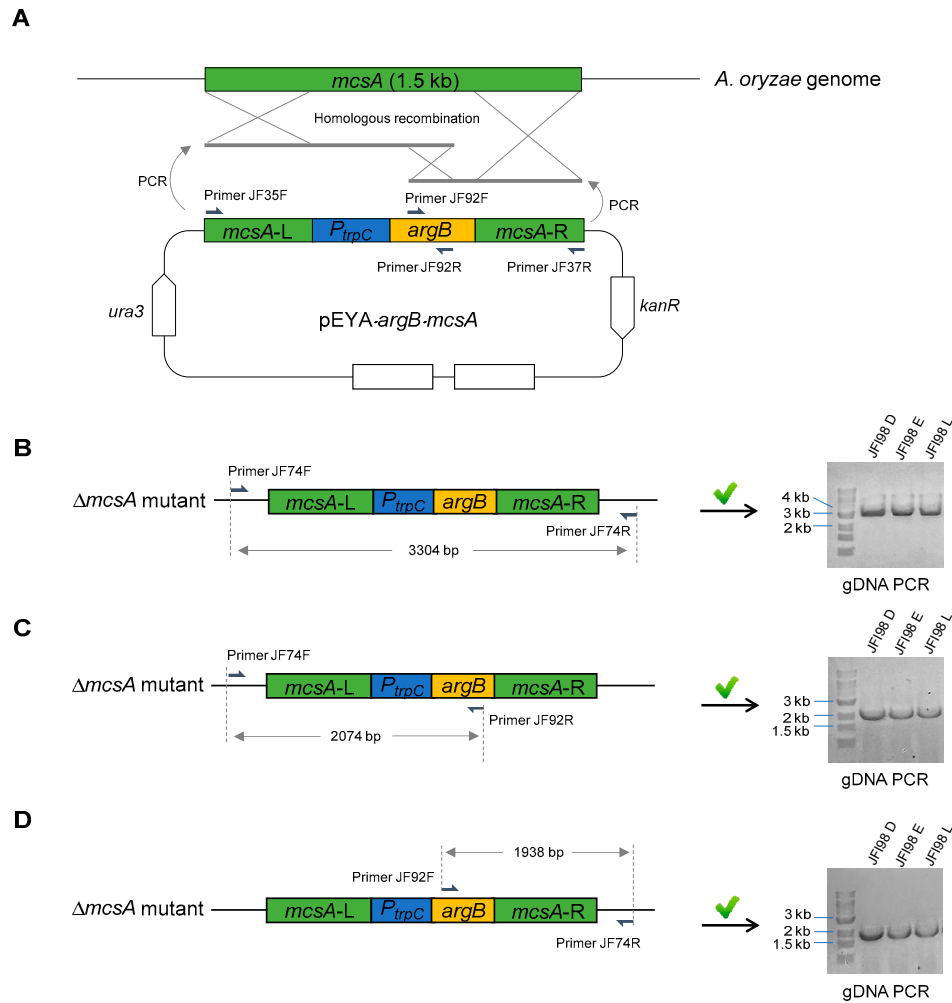

**Figure S9.2** Gene knockout of the *mcsA* target using the auxotrophic selection marker *argB*: **A**, the construction of the *mcsA* gene knockout cassette and the homologous recombination with *A. oryzae* genome; **B**, the identification of the whole gene cassette in the *mcsA* transformants by gDNA PCR using primers JF74F/JF74R; **C**, the identification of the left segment of the *mcsA* gene cassette using primers JF74F/JF92R; **D**, the identification of the right segment of the *mcsA* gene cassette using primers JF92F/JF74R.

The single *coaT* gene was attempted to delete as shown in Figure S9. Two overlapped PCR fragments were amplified from the *coaT* gene knockout cassette and then introduced into *A. oryzae* NSAR1 based on a bipartite gene knockout strategy (Figure S9.3 A).<sup>3</sup> After fungal transformation, 31 transformants were obtained and screened by genomic DNA PCR. Lastly, only one *coaT* mutant transformant JFI108B was found. The gene identification showed distinct differences from other transformants by PCR. Using primers JF105F and JF105R, the native *coaT* gene at 2890 bp was absent compared with other transformants (Figure S9.3 B). The identification of the first half of *coaT* gene cassette was ambiguous while the second half was determined in the transformant

JFI108B (Figure S9.3 C-D). Therefore, it is speculated that the integrity of *coaT* gene was disrupted *in vivo*.

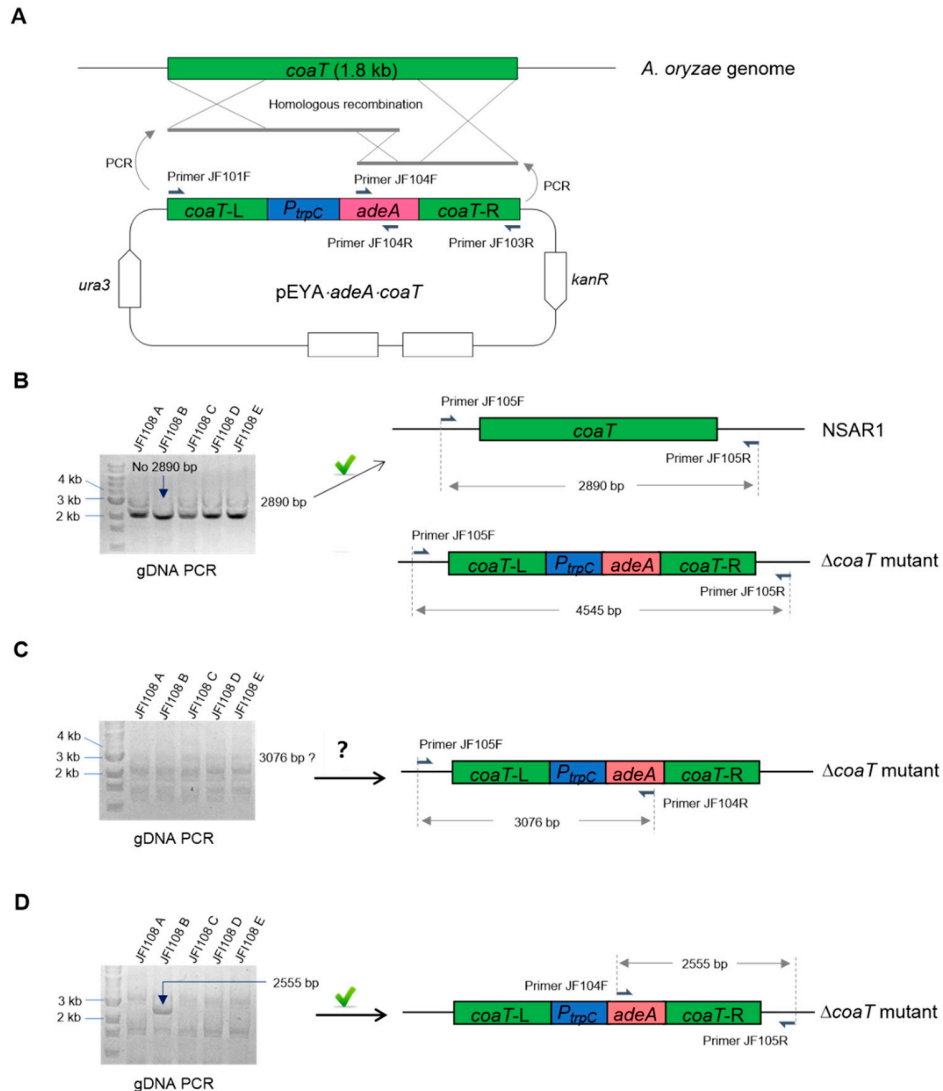

**Figure S9.3** Gene knockout of the *coaT* target using the auxotrophic selection marker *adeA*: **A**, the construction of the *coaT* gene knockout cassette and the homologous recombination with *A. oryzae* genome; **B**, the identification of the whole gene cassette in the *coaT* transformants using primers JF105F/JF105R; **C**, the identification of the left segment of the *coaT* gene cassette using primers JF105F/JF104R; **D**, the identification of the right segment of the *coaT* gene cassette using primers JF104F/JF105R.

## 10. Media, Solutions, Strains, Plasmids and Primers

**Table S3** Media used in the study.

| Media                    | Composition ( %(v/w)) | Ingredients                              |
|--------------------------|-----------------------|------------------------------------------|
| GN                       | 2.00                  | D(+)-Glucose Monohydrate                 |
|                          | 1.00                  | Nutrient broth Nr. 2 from Oxoid          |
| LB                       | 0.50                  | Yeast extract                            |
|                          | 1.00                  | Tryptone                                 |
|                          | 0.50                  | Sodium chloride                          |
| SM-URA                   | 0.17                  | Yeast nitrogen base                      |
|                          | 0.50                  | Ammonium sulfate                         |
|                          | 2.00                  | D(+)-Glucose Monohydrate                 |
|                          | 0.077                 | Complete supplement mixture minus Uracil |
| CZD/S                    | 3.50                  | Czapek Dox broth                         |
|                          | 18.22                 | D-Sorbitol                               |
|                          | 0.10                  | Ammonium sulfate                         |
|                          | 0.05                  | Adenine                                  |
|                          | 0.15                  | L-Methionine                             |
| CZD/S without methionine | 3.50                  | Czapek Dox broth                         |
|                          | 18.22                 | D-Sorbitol                               |
|                          | 0.10                  | Ammonium sulfate                         |
|                          | 0.05                  | Adenine                                  |
| DPY                      | 2.00                  | Dextrin from potato starch               |
|                          | 1.00                  | Polypeptone                              |
|                          | 0.50                  | Yeast extract                            |
|                          | 0.50                  | Monopotassium phosphate                  |
|                          | 0.50                  | Magnesium sulfate hexahydrate            |

**Table S4** Solutions used in the study.

| Solutions                            | Concentration          | Ingredients                      |
|--------------------------------------|------------------------|----------------------------------|
| Carbenicillin                        | 50 mg·mL <sup>-1</sup> | Carbenicillin                    |
| Kanamycin                            | 50 mg·mL <sup>-1</sup> | Kanamycin                        |
| PEG solution                         | 50 % (w/v)             | Polyethylene glycol 3350         |
| LiAc                                 | 1 M                    | Lithium acetate                  |
| Salmon testis DNA solution           | 2 mg·mL <sup>-1</sup>  | Salmon testis DNA                |
| Lysing solution for <i>A. oryzae</i> | 10 mg·mL <sup>-1</sup> | <i>Trichoderma</i> lysing enzyme |
|                                      | 0.8 M                  | NaCl                             |
| Solution I (pH 7.5)                  | 0.8 M                  | NaCl                             |
|                                      | 10 mM                  | CaCl <sub>2</sub>                |
|                                      | 50 mM                  | Tris-HCl, 7.5                    |
| Solution II (pH 7.5)                 | 60 % (w/v)             | Polyethylene glycol 3350         |
|                                      | 0.8 M                  | NaCl                             |
|                                      | 10 mM                  | CaCl <sub>2</sub>                |
|                                      | 50 mM                  | Tris-HCl, 7.5                    |



**Table S5** Strains used in the study.

| Strains                                                          | Genotype                                                                                                                                                                   | Origin                   | Function             |
|------------------------------------------------------------------|----------------------------------------------------------------------------------------------------------------------------------------------------------------------------|--------------------------|----------------------|
| <i>E. coli</i> One Shot™ Top10                                   | <i>F mcrA Δ(mrr-hsdRMS-mcrBC) Φ80lacZΔM15 Δ lacX74 recA1 araD139 Δ(ara-leu)7697 galU galK rpsL (Str<sup>R</sup>) endA1 nupG</i>                                            | Thermo Fisher Scientific | Plasmid construction |
| <i>E. coli</i> One Shot™ <i>ccdB</i> Survival™ 2 T1 <sup>R</sup> | <i>F mcrA Δ(mrr-hsdRMS-mcrBC) Φ80lacZΔM15 Δ lacX74 recA1 araD139 Δ(ara-leu)7697 galU galK rpsL (Str<sup>R</sup>) endA1 nupG fhuA::IS2</i>                                  | Thermo Fisher Scientific | Plasmid construction |
| <i>E. coli</i> One Shot™ OmniMAX™ 2 T1 <sup>R</sup>              | <i>F' {proAB lacIq lacZΔM15 Tn10(Tet<sup>R</sup>) Δ(ccdAB)} mcrA Δ(mrr hsdRMS-mcrBC) Φ 80(lacZ)ΔM15 Δ(lacZYA-argF)U169 endA1 recA1 supE44 thi-1 gyrA96 relA1 tonA panD</i> | Thermo Fisher Scientific | Plasmid construction |
| <i>S. cerevisiae</i> CEN.PK                                      | <i>MATa/α ura3-52/ura3-52 trp1-289/trp1-289 leu2-3_112/leu2-3_112his3 Δ1/his3 Δ1 MAL2-8C/MAL2-8C SUC2/SUC2</i>                                                             | Hahn group, Hannover     | Plasmid construction |
| <i>A. oryzae</i> NSAR1                                           | <i>argB<sup>-</sup> sC<sup>-</sup> adeA<sup>-</sup> niaD<sup>-</sup></i>                                                                                                   | Lazarus group, Bristol   | Metablite production |

**Table S6** Plasmids used and constructed in this study.

| No.   | Name (inserted genes)                 | Marker genes            | Expression host        |
|-------|---------------------------------------|-------------------------|------------------------|
| I     | pTYGS- <i>arg</i>                     | <i>ampR, ura3, argB</i> | -                      |
| II    | pTYGS- <i>arg-pccABE</i>              | <i>ampR, ura3, argB</i> | -                      |
| III   | pUC57- <i>debs1te-f1</i>              | <i>ampR</i>             | -                      |
| IV    | pUC57- <i>debs1te-f2</i>              | <i>ampR</i>             | -                      |
| V     | pUC57- <i>debs1te-f3</i>              | <i>ampR</i>             | -                      |
| VI    | pUC57- <i>debs1te-f4</i>              | <i>ampR</i>             | -                      |
| VII   | pEYA                                  | <i>kanR, ura3</i>       | -                      |
| VIII  | pEYA- <i>debs1te</i>                  | <i>kanR, ura3</i>       | -                      |
| IX    | pTYGS- <i>arg-debs1te-pccABE</i>      | <i>ampR, ura3, argB</i> | <i>A. oryzae</i> NSAR1 |
| X     | pEYA- <i>debs1te-egfp</i>             | <i>ampR, ura3, argB</i> | <i>A. oryzae</i> NSAR1 |
| XI    | pTYGS- <i>arg-debs1te-egfp</i>        | <i>ampR, ura3, argB</i> | <i>A. oryzae</i> NSAR1 |
| XII   | pTYGS- <i>arg-pccA-egfp</i>           | <i>ampR, ura3, argB</i> | <i>A. oryzae</i> NSAR1 |
| XIII  | pTYGS- <i>arg-pccB-egfp</i>           | <i>ampR, ura3, argB</i> | <i>A. oryzae</i> NSAR1 |
| XIV   | pTYGS- <i>arg-pccE-egfp</i>           | <i>ampR, ura3, sC</i>   | -                      |
| XV    | pTYGS- <i>met</i>                     | <i>ampR, ura3, sC</i>   | <i>A. oryzae</i> NSAR1 |
| XVI   | pTYGS- <i>met-sfp</i>                 | <i>ampR, ura3, sC</i>   | <i>A. oryzae</i> NSAR1 |
| XVII  | pTYGS- <i>met-sepptII</i>             | <i>ampR, ura3, argB</i> | <i>A. oryzae</i> NSAR1 |
| XVIII | pTYGS- <i>arg-debs1te-egfp-pccABE</i> | <i>ampR, ura3, sC</i>   | <i>A. oryzae</i> NSAR1 |
| XIX   | pTYGS- <i>met-sepptII-pcsA</i>        | <i>kanR, ura3</i>       | -                      |

| No. | Name ( <u>inserted genes</u> ) | Marker genes      | Expression host |
|-----|--------------------------------|-------------------|-----------------|
| XX  | pEYA- <u>argB-mcsA</u>         | <i>kanR, ura3</i> | -               |
| XXI | pEYA- <u>adeA-coaT</u>         | <i>kanR, ura3</i> | -               |

**Table S7** Primers used in this study.

| No.    | Sequence (5'-3')             | Information                    |
|--------|------------------------------|--------------------------------|
| JF4F   | CTGCGCTTCTGATATCGGGT         | <i>pcsA</i> test primer        |
| JF4R   | GTCCCTGTATCATGCCTCCG         | <i>pcsA</i> test primer        |
| JF25F  | CCCATTGTTTAATGATGACGAG       | <i>pcsA</i> test primer        |
| JF20R  | CCAATCGGTGACAGGCTCGAA        | <i>debs1te</i> test primer     |
| JF22F  | CGATCGCGGCCATCCTCCTCG        | <i>debs1te</i> test primer     |
| JF19F  | ATACCCCTGCCACCTCCTACC        | <i>pccA</i> test primer        |
| JF23R  | CTCCTCGACGAGCTTCTGATGG       | <i>pccA</i> test primer        |
| JF24R  | ACGACGAGGGAGATCTGAGG         | <i>pccB</i> test primer        |
| JF6F1  | CCATGCCCATGCGAACCACTC        | <i>mcsA</i> test primer        |
| JF6R   | GGTAGAAGAGAACACCAGACGC       | <i>mcsA</i> test primer        |
| JF26R  | GGTGGGACTTCTCGGCCAATT        | <i>mcsA</i> test primer        |
| JF18F  | GGCGGCCCTTCTACCTCAAG         | <i>coaT</i> test primer        |
| JF18R  | GAGGAGACAGACCACGCACG         | <i>coaT</i> test primer        |
| JF27R  | GCACCAGGGATGATACCACCAT       | <i>coaT</i> test primer        |
| JF35F  | ATGGCCATGCCCATGCGAAC         | <i>mcsA</i> overlap L primer   |
| JF37R  | TCATTTCTTCAGGCCCAGGA         | <i>mcsA</i> overlap R primer   |
| JF74F  | CGACACAAAGCAGTGCTCCTGTGTTG   | <i>mcsA</i> mutant test primer |
| JF74R  | CTGGCGTCTATGCAAATGGGCATATGGC | <i>mcsA</i> mutant test primer |
| JF92F  | ACTCCTCGCAAACCATGCC          | <i>argB</i> primer             |
| JF92R  | TGGTTTGCAGAAGCTTTCCTG        | <i>argB</i> primer             |
| JF101F | AAGATAGACGAAAAGAAAAC         | <i>coaT</i> overlap L primer   |
| JF103R | GAGGTGTCTTCTGTTGGGAG         | <i>coaT</i> overlap R primer   |
| JF104F | GGTTGACTGCCTCAGGCCTGC        | <i>adeA</i> primer             |
| JF104R | CGACCGATCTCGTACGAGTCC        | <i>adeA</i> primer             |
| JF105F | GAGAGCCGAGAATACGCCGAG        | <i>coaT</i> mutant test primer |
| JF105R | GAGATGTGGGTGCTCATGCTGG       | <i>coaT</i> mutant test primer |
| 146    | GTAAAACGACGGCCAG             | General primer (pE-YA)         |
| 147    | TGCTTGGAGGATAGCAACCG         | General primer ( $P_{amyB}$ )  |
| 148    | GGGGATGACAGCAGTAACGA         | General primer ( $T_{amyB}$ )  |
| 168    | CTTCCGTCCTCCAAGTTAGT         | General primer ( $P_{eno}$ )   |
| 189    | CTTGTGCAGCTCAGAGGTT          | General primer ( $T_{eno}$ )   |
| 169    | ACCATCTTCGATAATGTGT          | General primer ( $T_{eno}$ )   |
| 170    | ACTTCATCGCAGCTTGACTA         | General primer ( $P_{gpdA}$ )  |
| 171    | TCTTTCATTATCTTGCGAAC         | General primer ( $T_{gpdA}$ )  |

## 11. References

---

1. Gietz, R. D.; Schiestl, R. H., *Nat. Protoc.* **2007**, *2*, 35–37.
2. Pahirulzaman, K. A. K.; Williams, K.; Lazarus, C. M., *A Toolkit for Heterologous Expression of Metabolic Pathways in *Aspergillus oryzae**, 1st ed.; Elsevier Inc., 2012; Vol. 517.
3. D. E. Cane, R. H. Lambalot, P. C. Prabhakaran, W. R. Ott, *J. Am. Chem. Soc.*, **1993**, *115*, 522–526.
4. C.-L. Kao, S. A. Borisova, H. J. Kim, H. Liu, *J. Am. Chem. Soc.*, **2006**, *128*, 5606–5607.
5. N. Schläger, A. Kirschning, *Org. Biomol. Chem.*, **2012**, *10*, 7721–7729.
6. D. A. Evans, A. S. Kim, R. Metternich, V. J. Novack, *J. Am. Chem. Soc.*, **1998**, *120*, 5921–5942.
7. B. J. Beck, C. C. Aldrich, R. A. Fecik, K. A. Reynolds, D. H. Sherman, *J. Am. Chem. Soc.*, **2003**, *125*, 12551–12557.
8. M. J. B. Brown, J. Cortes, A. L. Cutter, P. F. Leadlay, J. Staunton, *J. Chem. Soc. Chem. Commun.*, **1995**, *0*, 1517–1518.
9. C. Wang, K. Becker, S. Pfütze, E. Kuhnert, M. Stadler, R. J. Cox, E. Skellam, *Org. Lett.*, **2019**, *21*, 8756–8760.
10. T. T. Dao, K. M. J. de Mattos-Shipley, I. M. Prosser, K. Williams, M. K. Zacharova, C. M. Lazarus, C. L. Willis, A. M. Bailey, *Front. Fungal Biol.*, 2021, **2**: 632542.
